# Supplementary material for: Recyclable heterogeneous gold(i)-catalyzed oxidative ring expansion of alkynyl quinols: a practical access to tropone and its analogues
Source: Royal Society of Chemistry journal article supplement (doi:10.1039/d1dt00988e), 2021-01-01
Supplement: d1dt00988e1.pdf [file d1dt00988e1.pdf]

## **Recyclable heterogeneous gold(I)-catalyzed oxidative ring expansion of alkynyl quinols: A practical access to tropone and its analogues**

Yingying Du, Bin Huang, Jiajun Zeng, Mingzhong Cai\*

Key Laboratory of Functional Small Organic Molecule, Ministry of Education and  
College of Chemistry & Chemical Engineering, Jiangxi Normal University, Nanchang  
330022, China

E-mail: mzcai@jxnu.edu.cn

**<sup>1</sup>H NMR and <sup>13</sup>C NMR Spectra of compounds 3a-3s and 5a-5g**

**S2-S27**

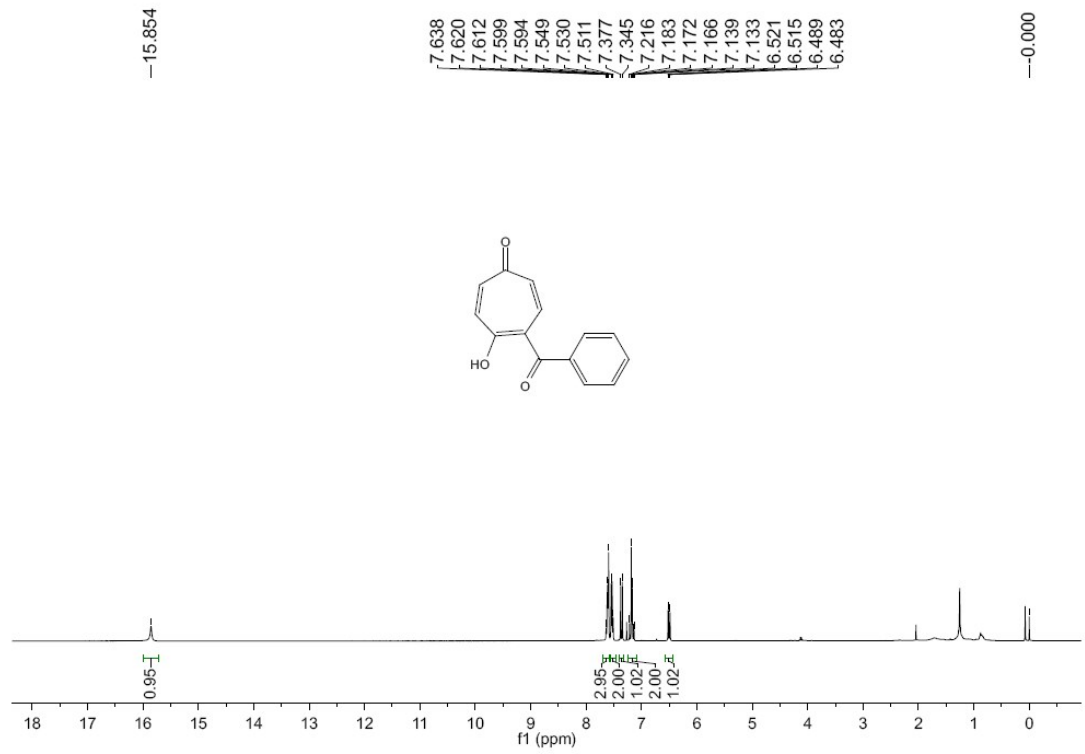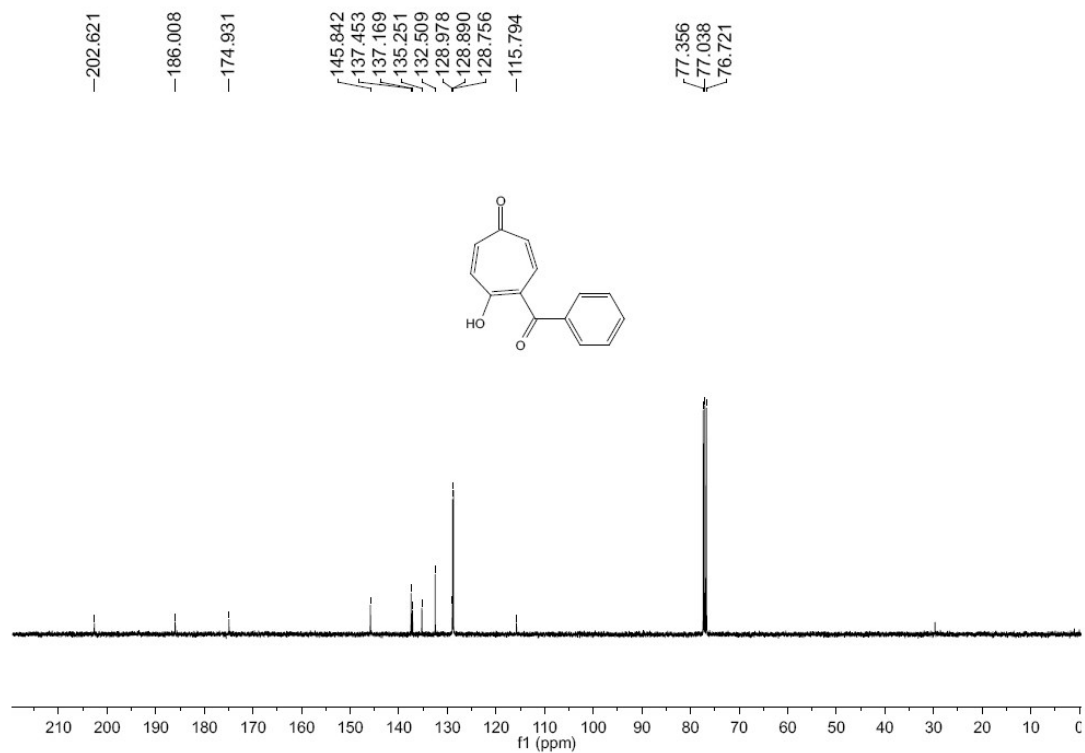

<sup>1</sup>H NMR and <sup>13</sup>C NMR spectra of compound **3a**

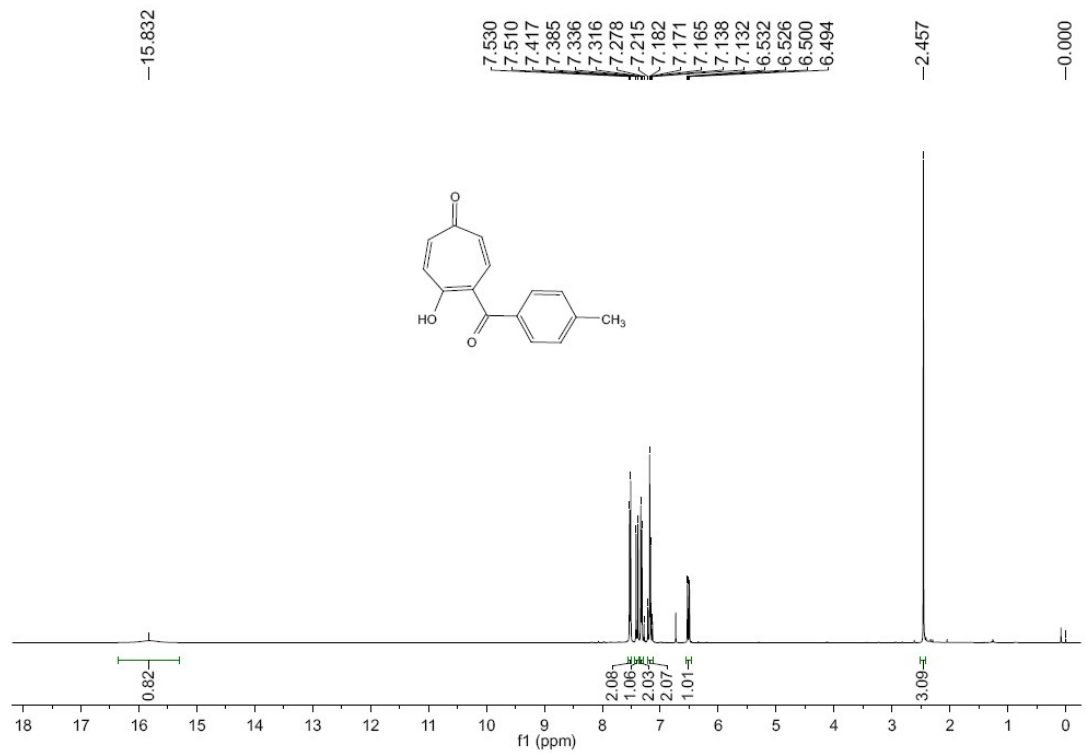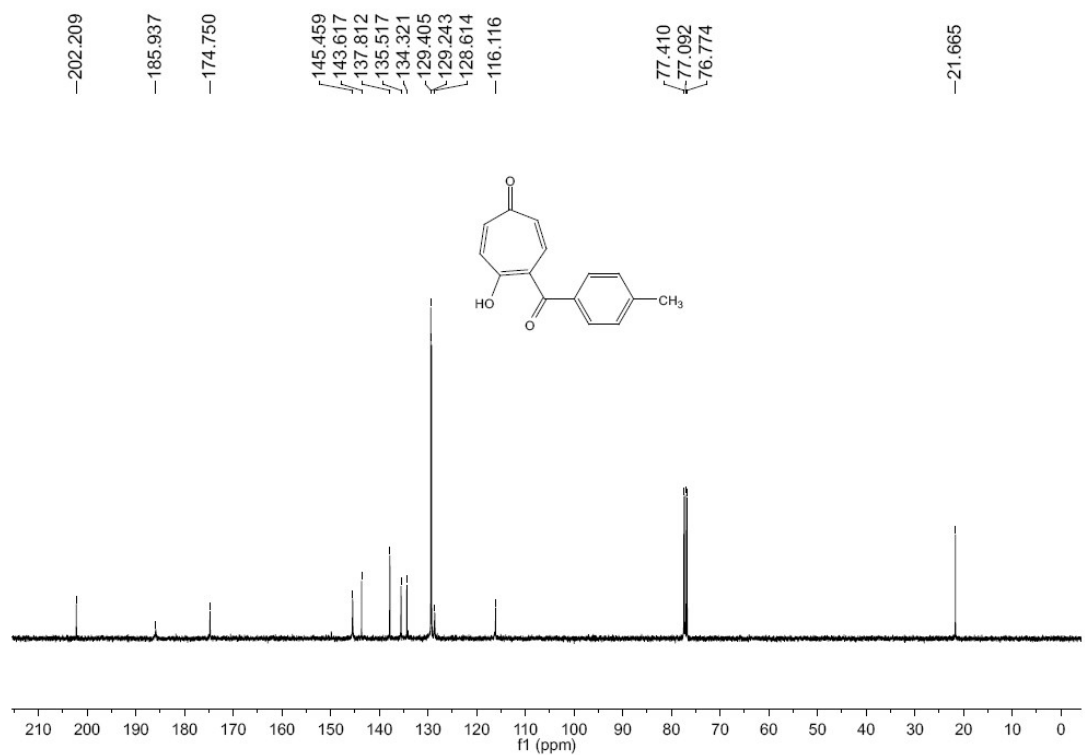

<sup>1</sup>H NMR and <sup>13</sup>C NMR spectra of compound **3b**

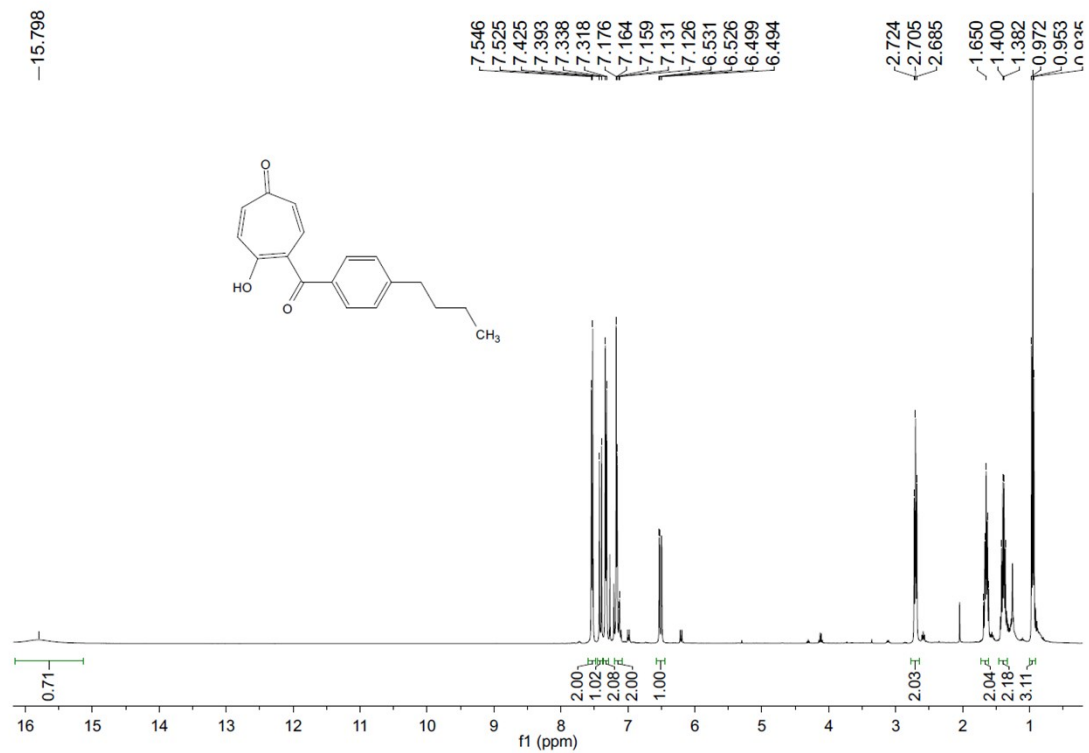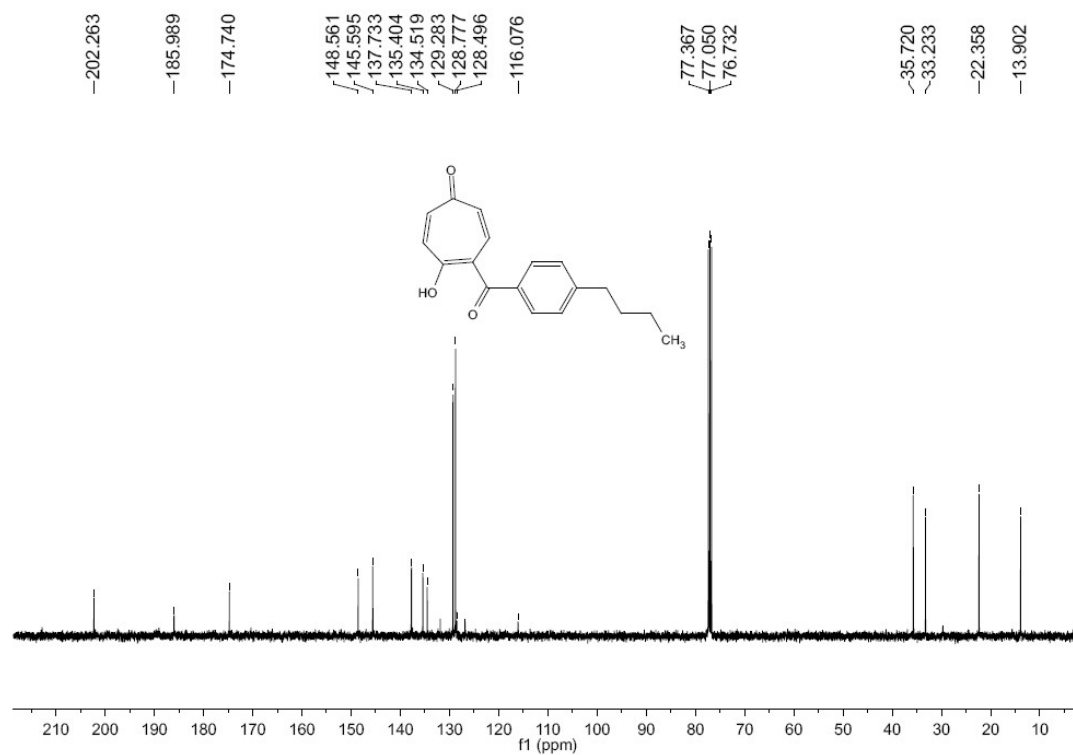

<sup>1</sup>H NMR and <sup>13</sup>C NMR spectra of compound **3c**

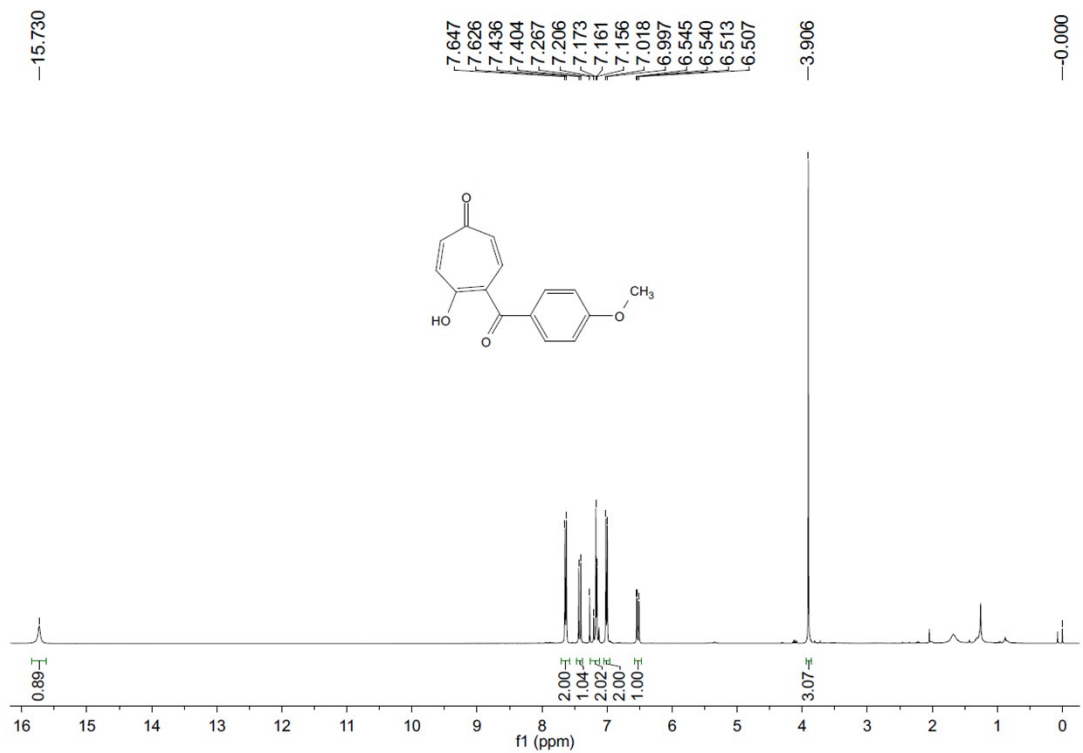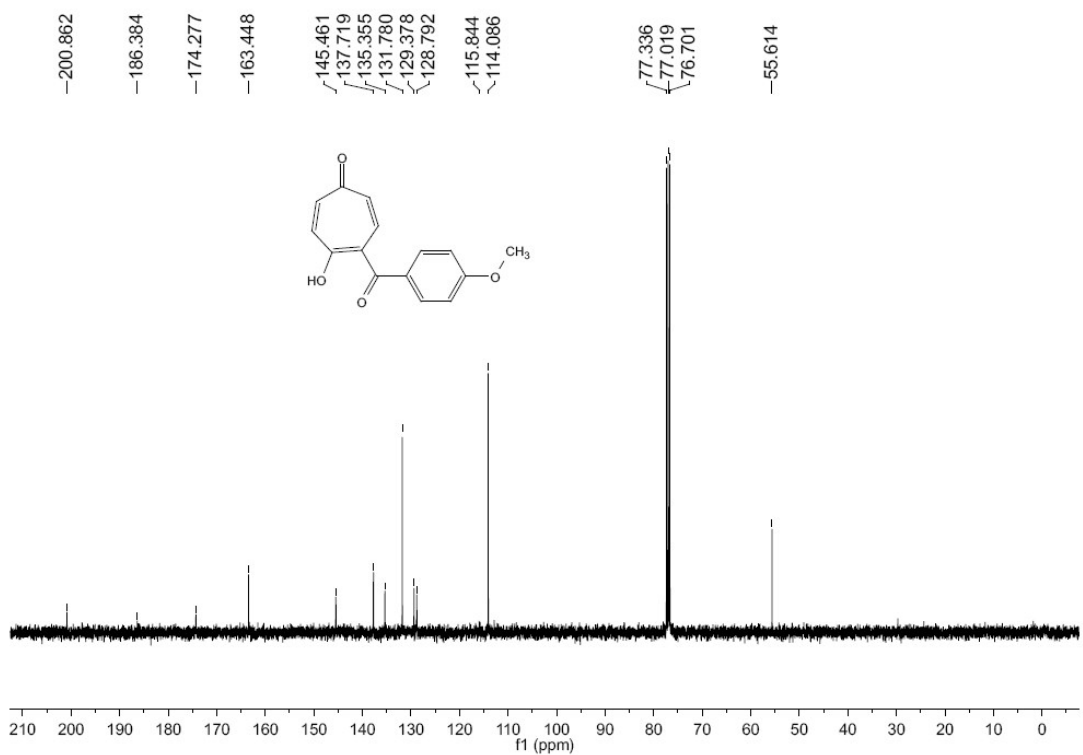

<sup>1</sup>H NMR and <sup>13</sup>C NMR spectra of compound **3d**

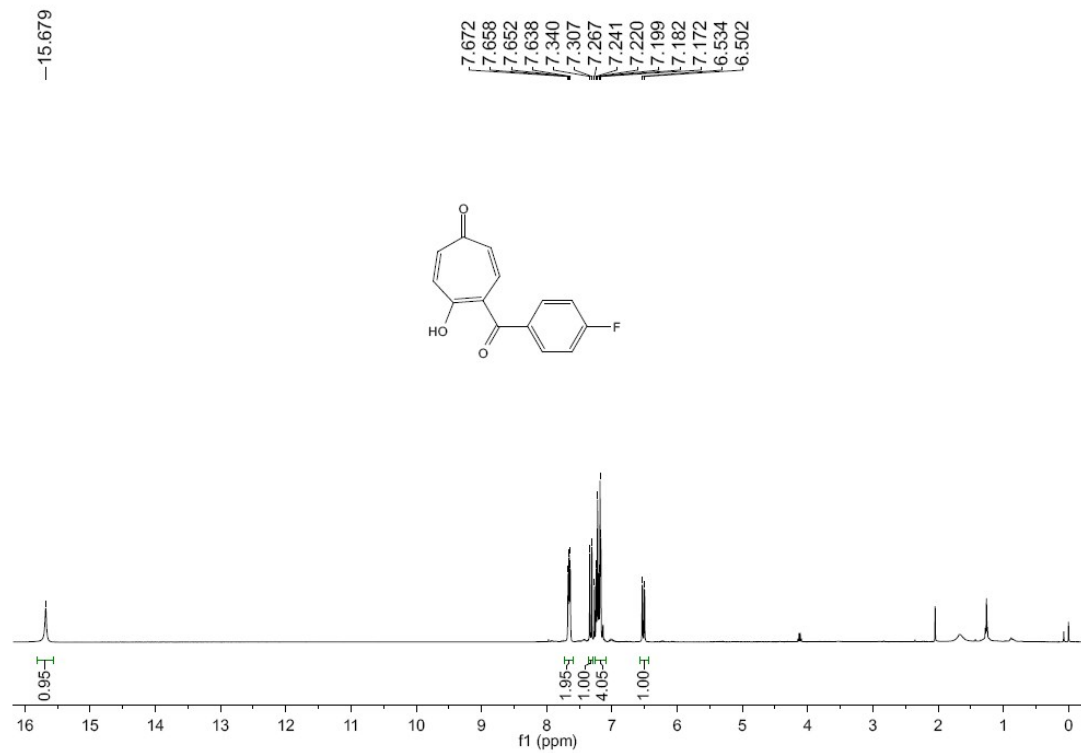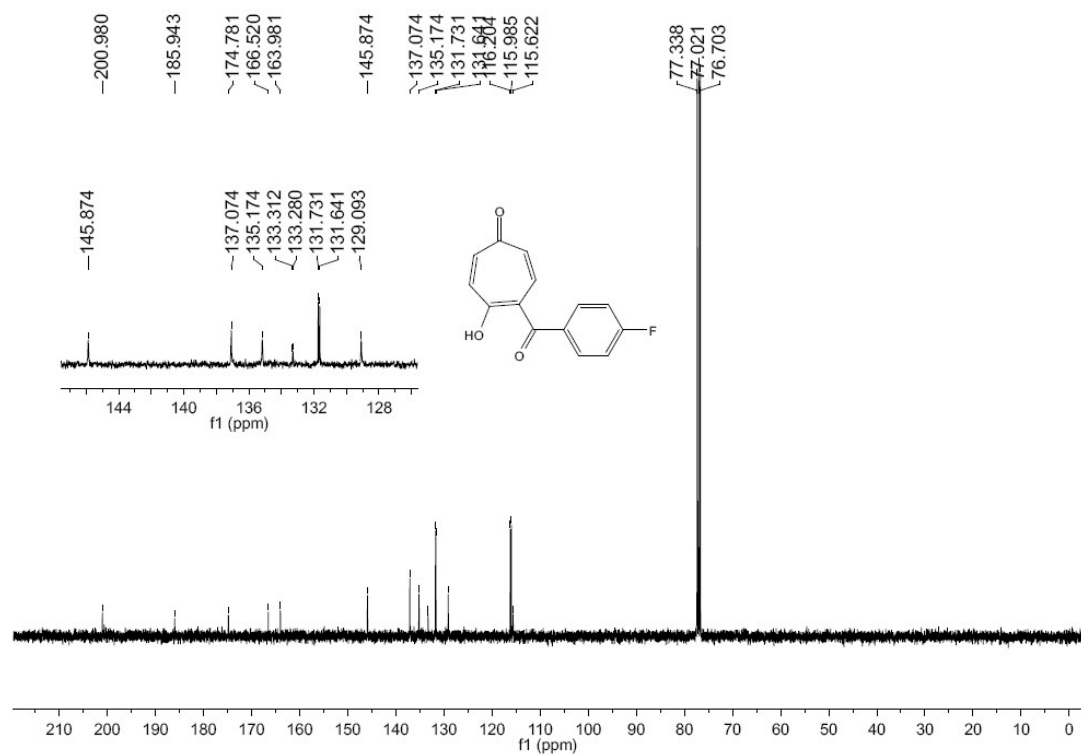

$^1\text{H}$  NMR and  $^{13}\text{C}$  NMR spectra of compound **3e**

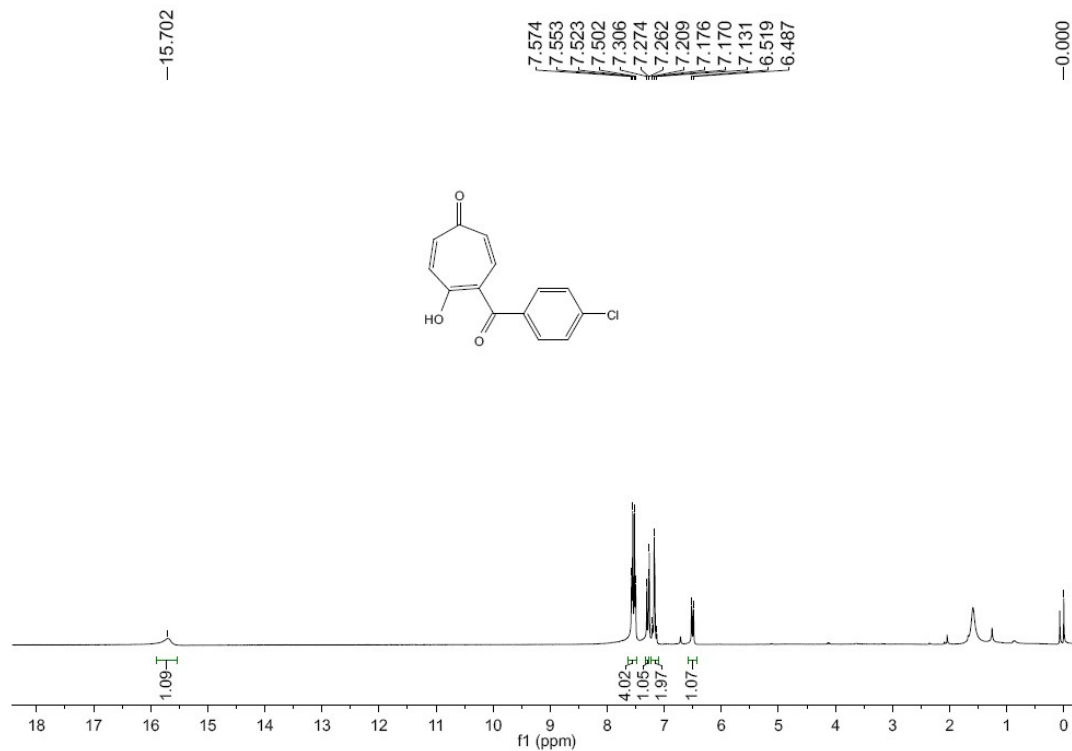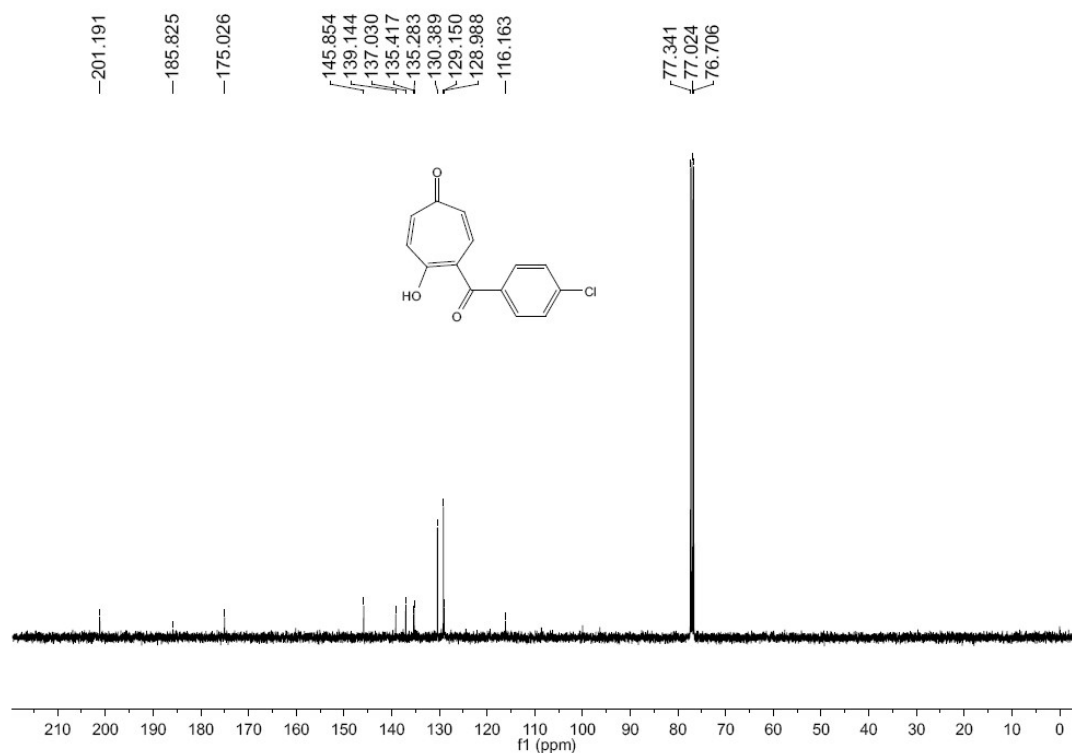

$^1\text{H}$  NMR and  $^{13}\text{C}$  NMR spectra of compound **3f**

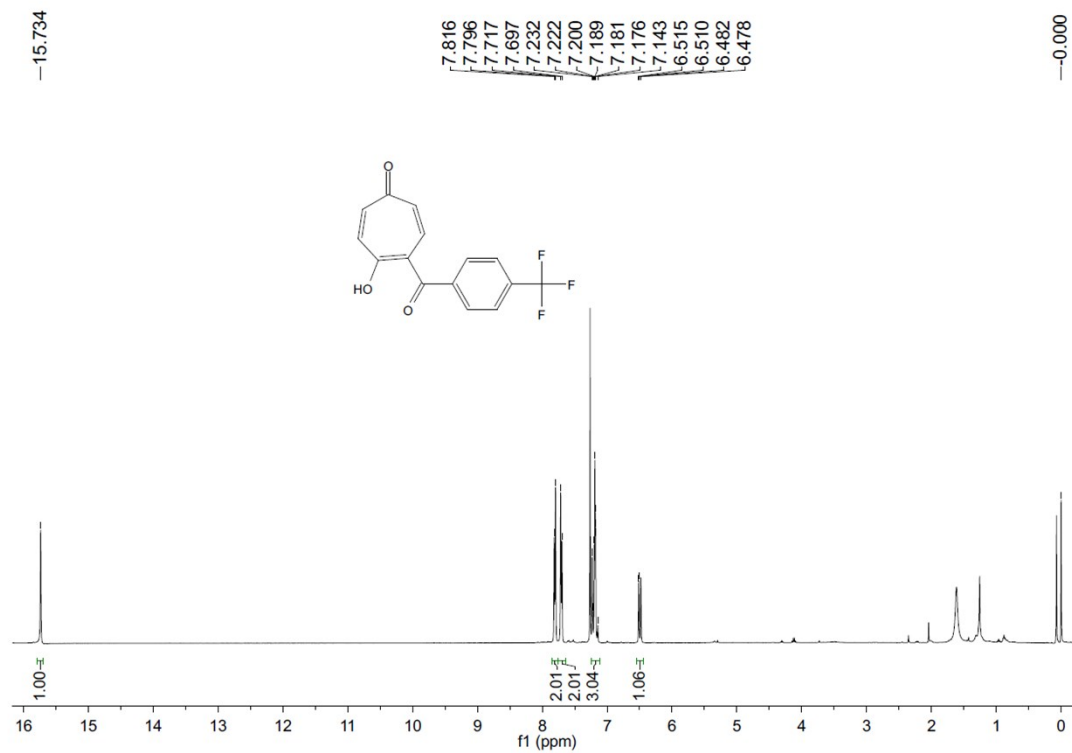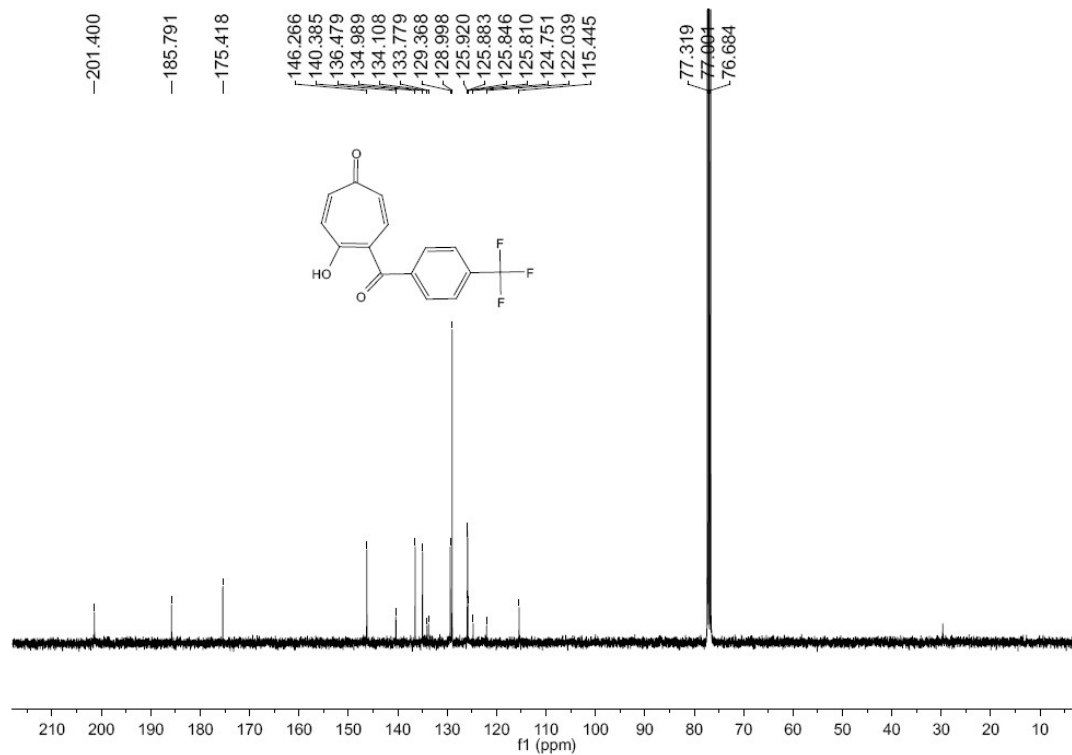

$^1\text{H}$  NMR and  $^{13}\text{C}$  NMR spectra of compound **3g**



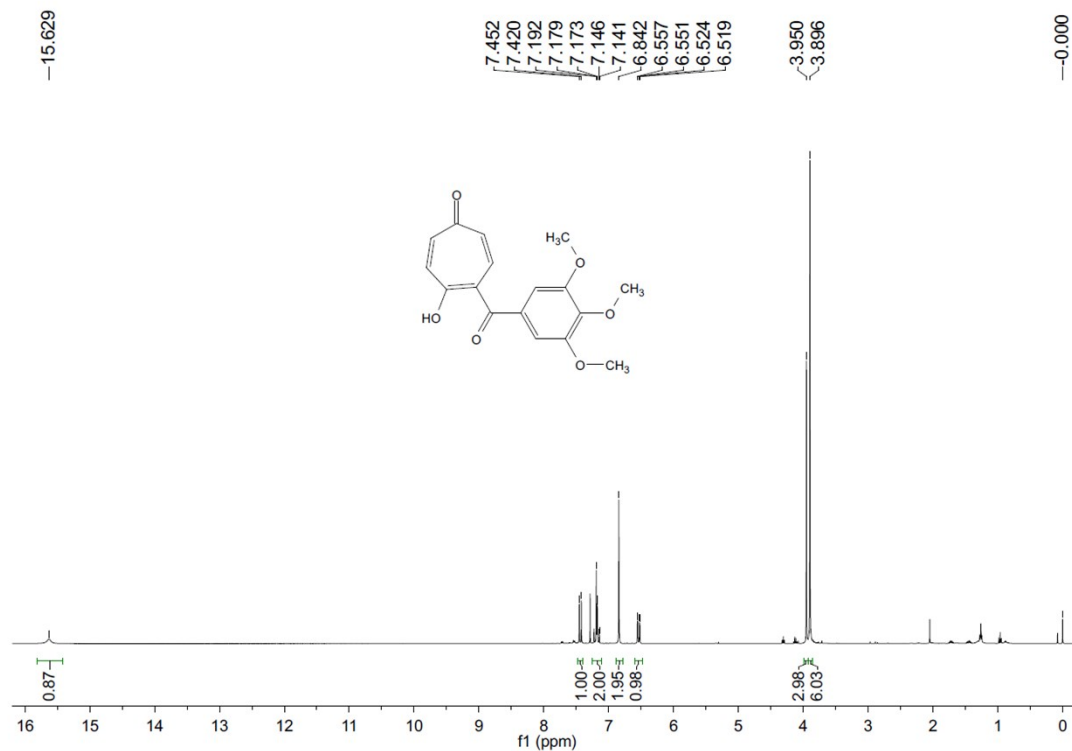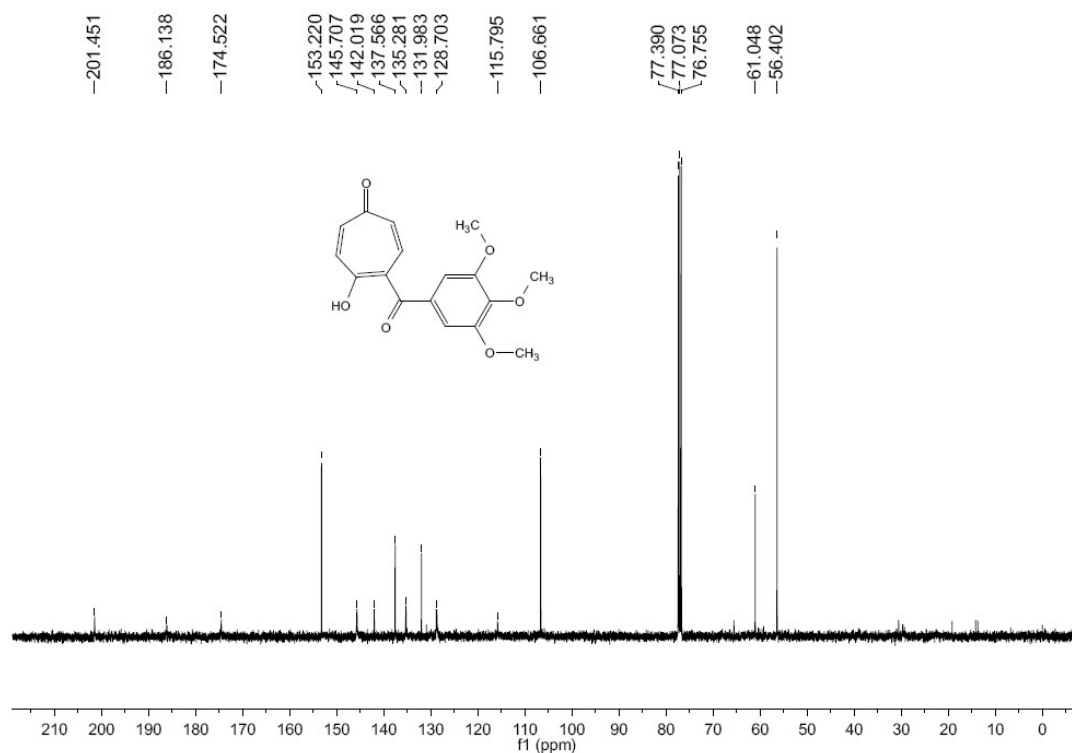

$^1\text{H}$  NMR and  $^{13}\text{C}$  NMR spectra of compound **3h**

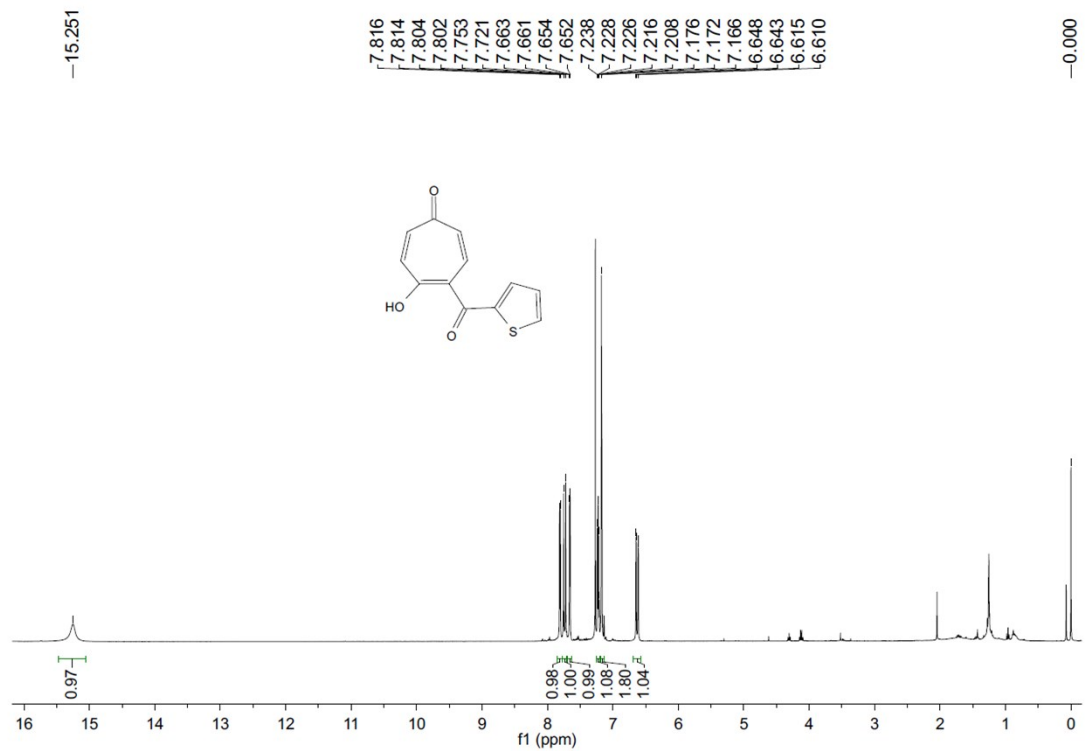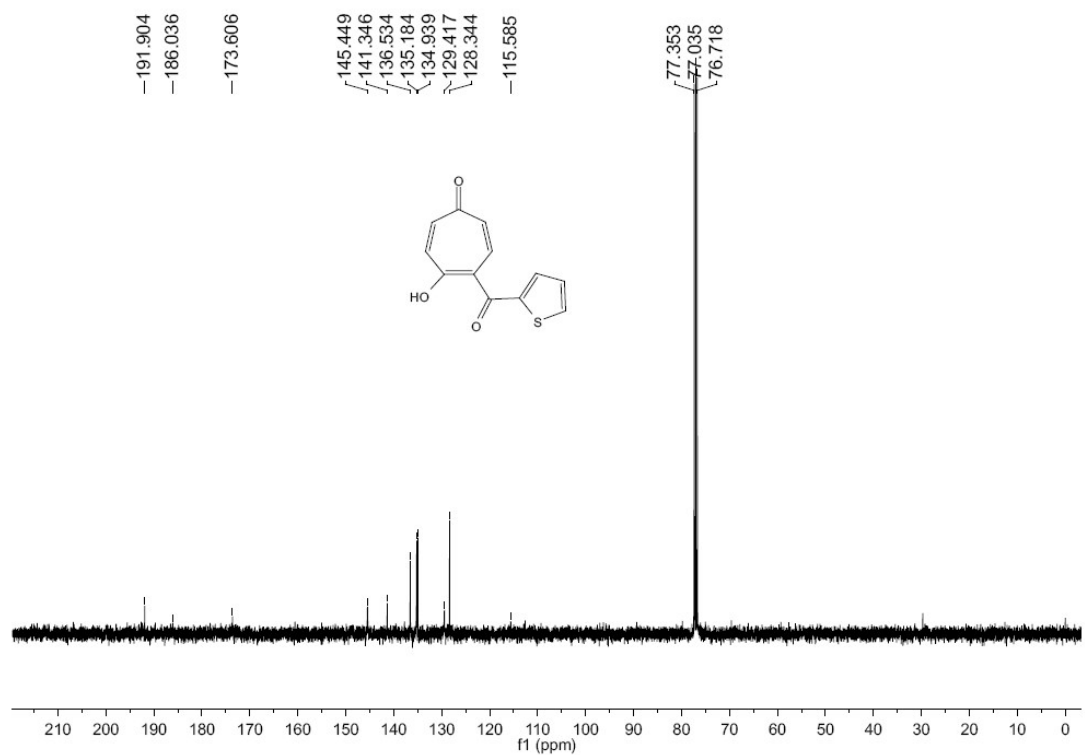

<sup>1</sup>H NMR and <sup>13</sup>C NMR spectra of compound **3i**

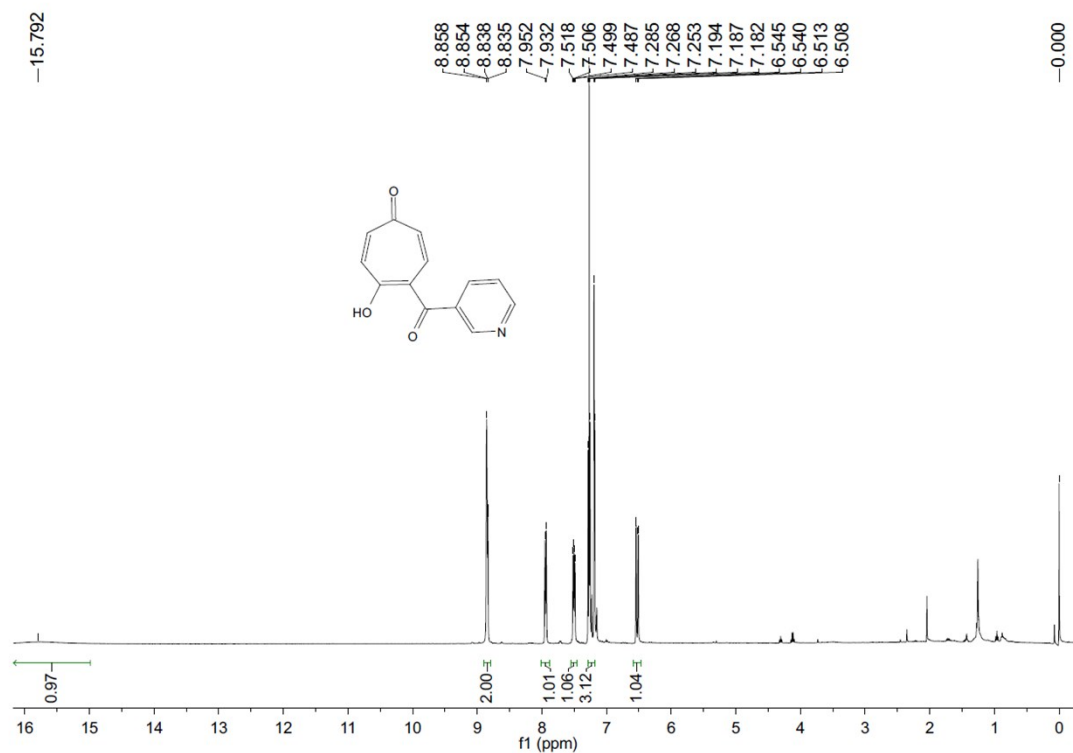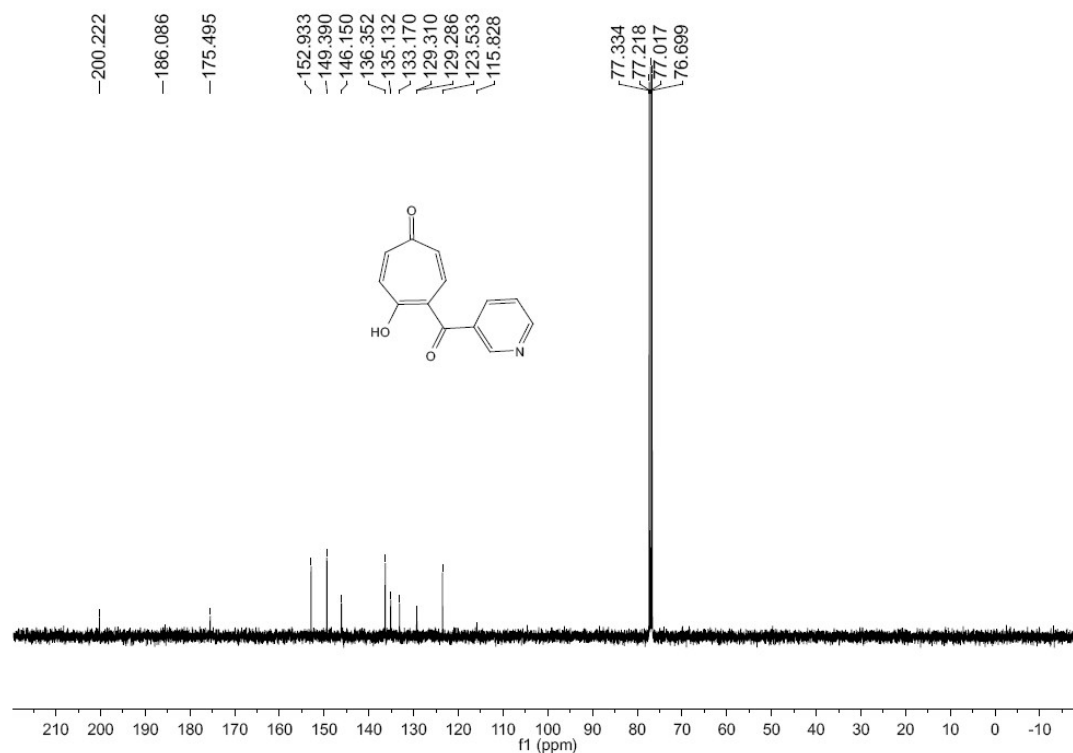

<sup>1</sup>H NMR and <sup>13</sup>C NMR spectra of compound 3j

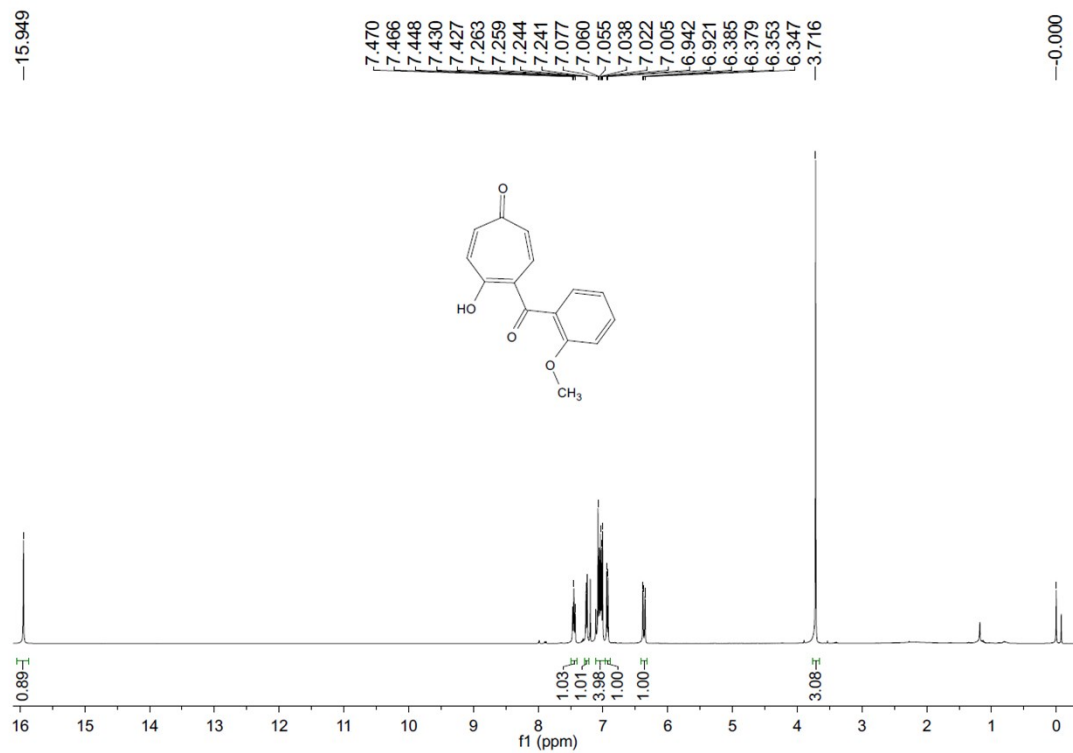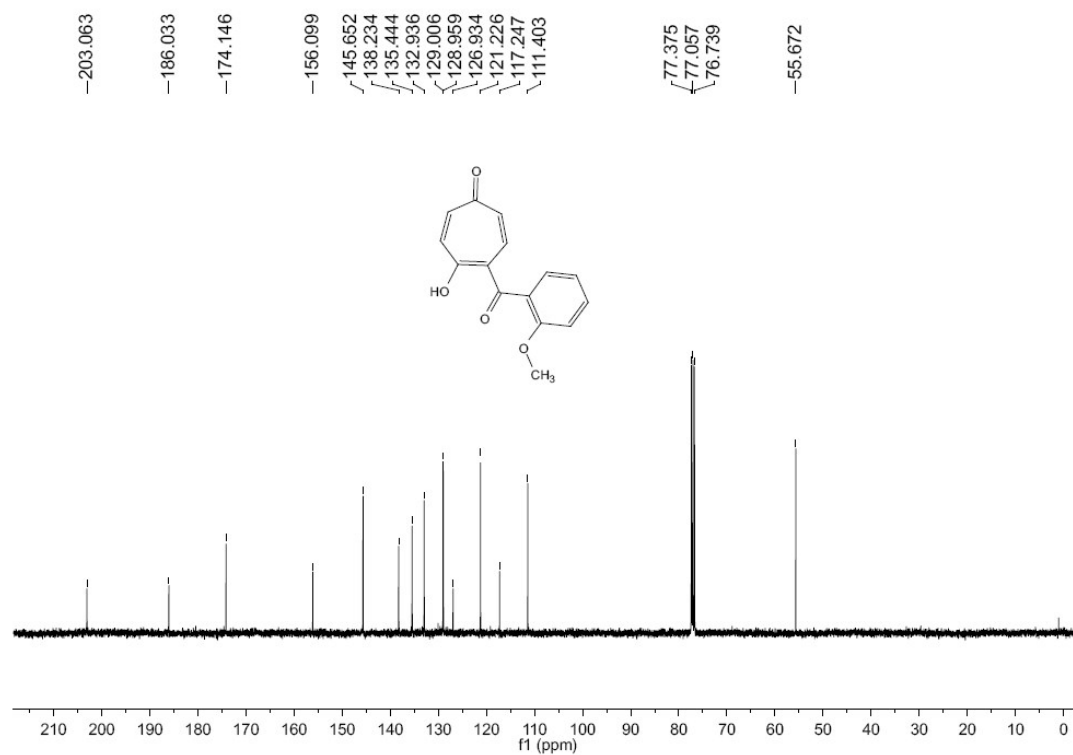

<sup>1</sup>H NMR and <sup>13</sup>C NMR spectra of compound 3k

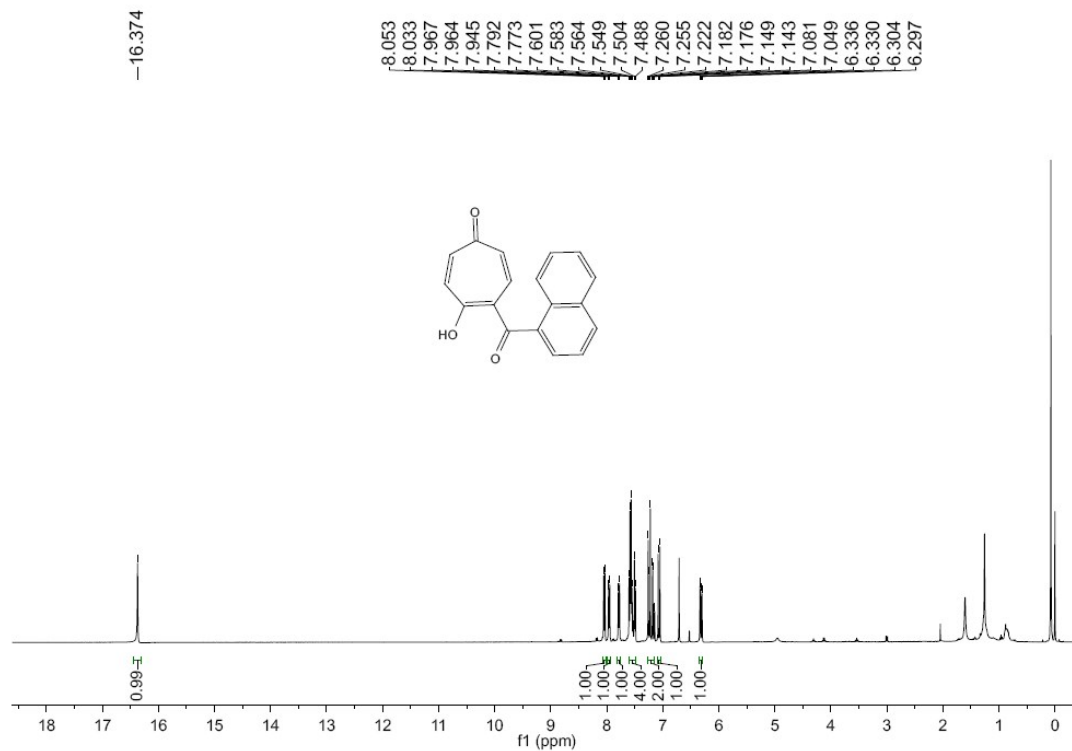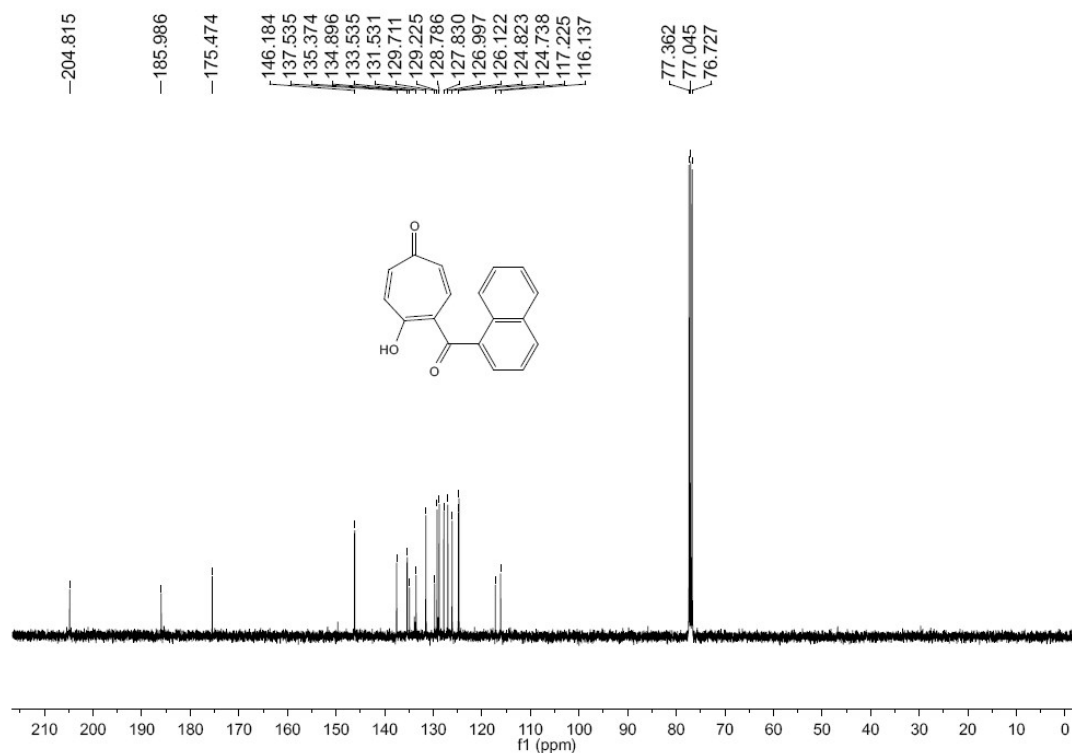

$^1\text{H}$  NMR and  $^{13}\text{C}$  NMR spectra of compound 31

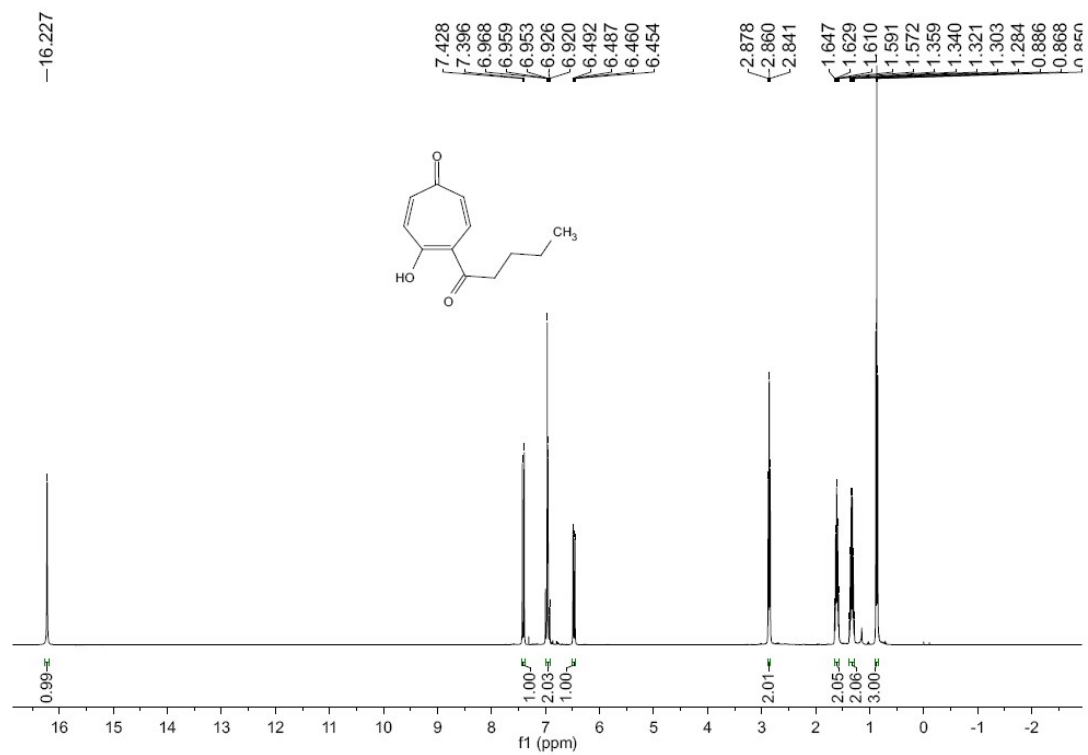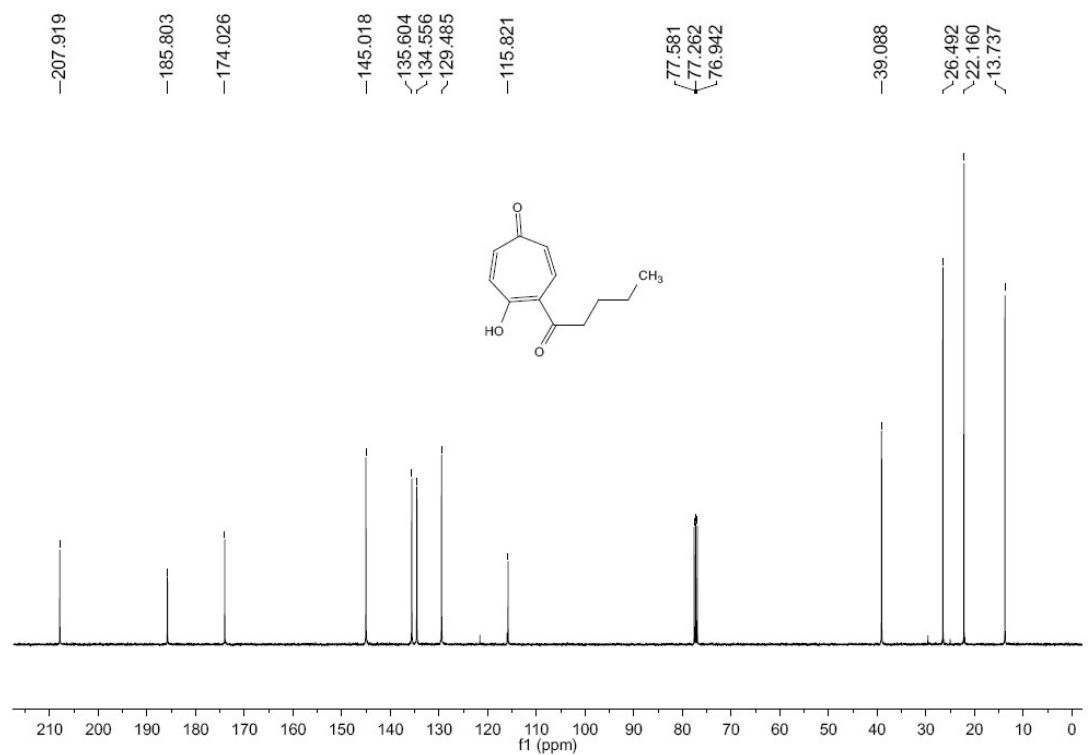

<sup>1</sup>H NMR and <sup>13</sup>C NMR spectra of compound **3m**

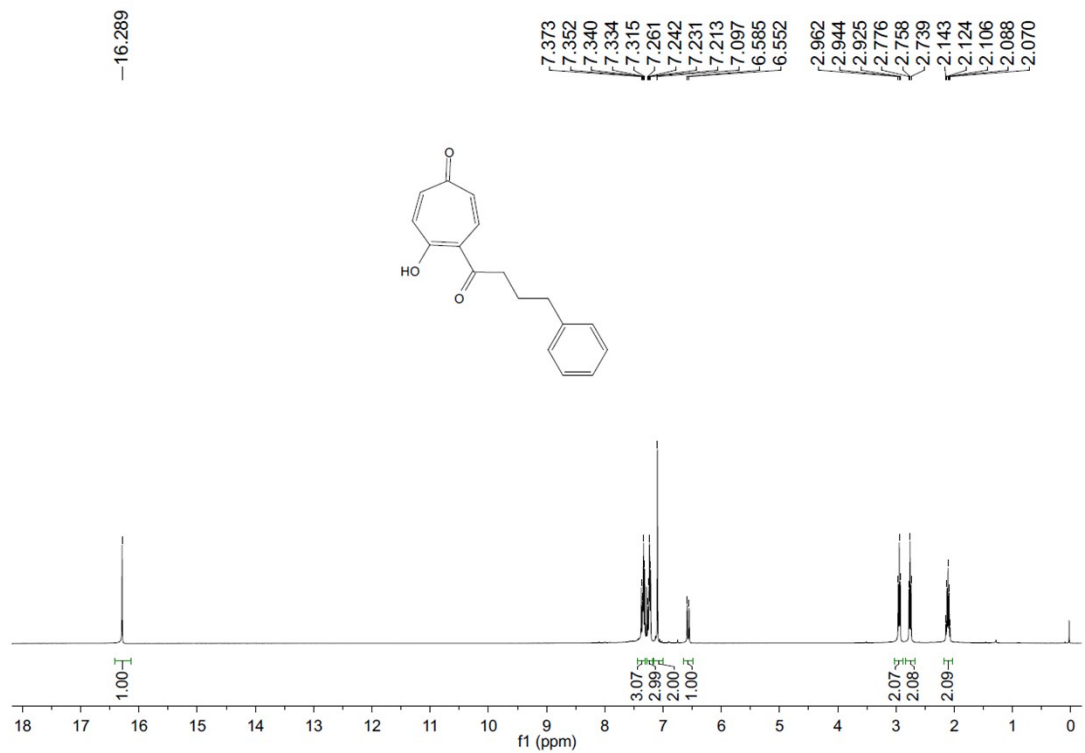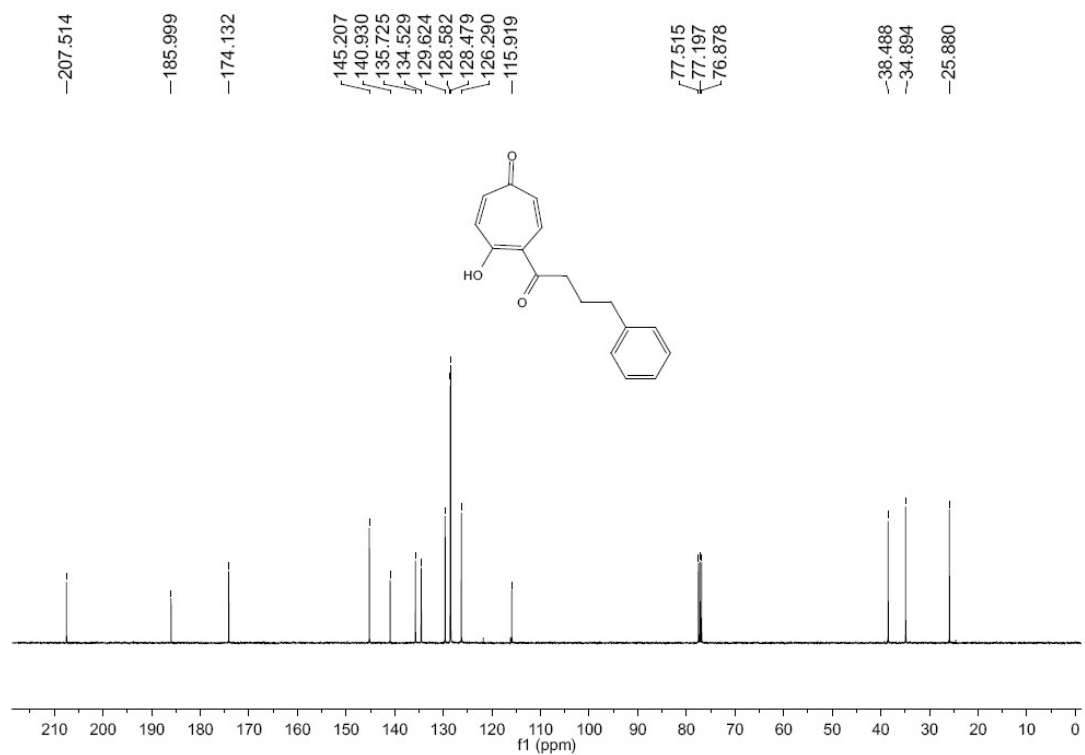

<sup>1</sup>H NMR and <sup>13</sup>C NMR spectra of compound **3n**

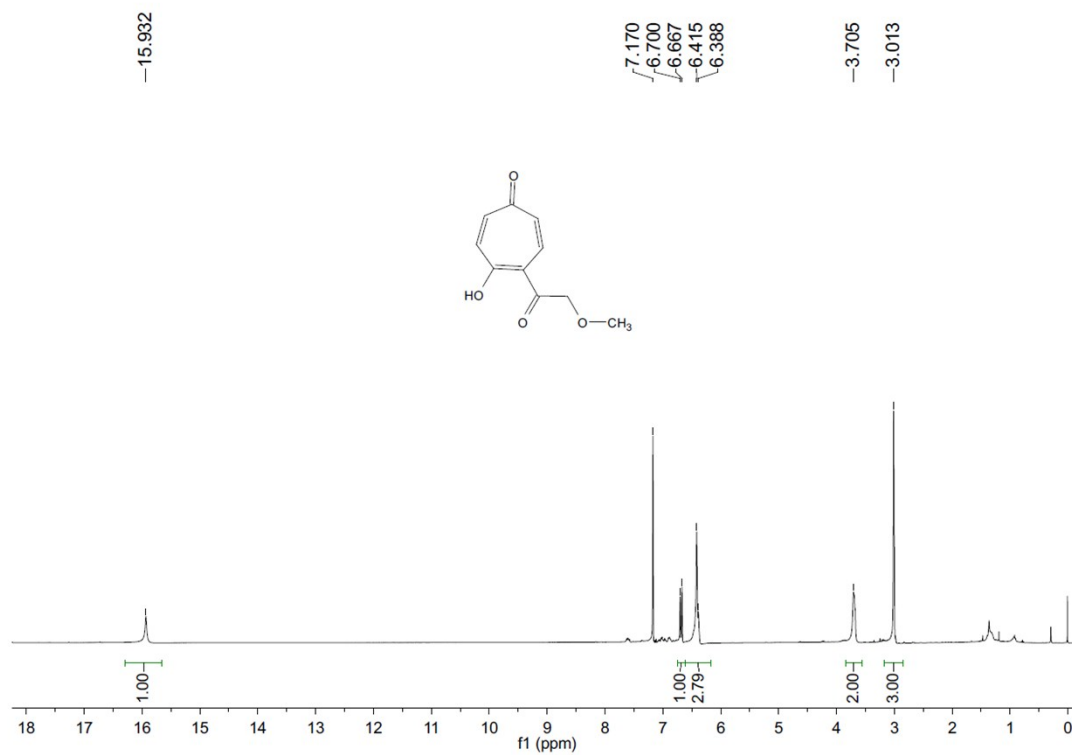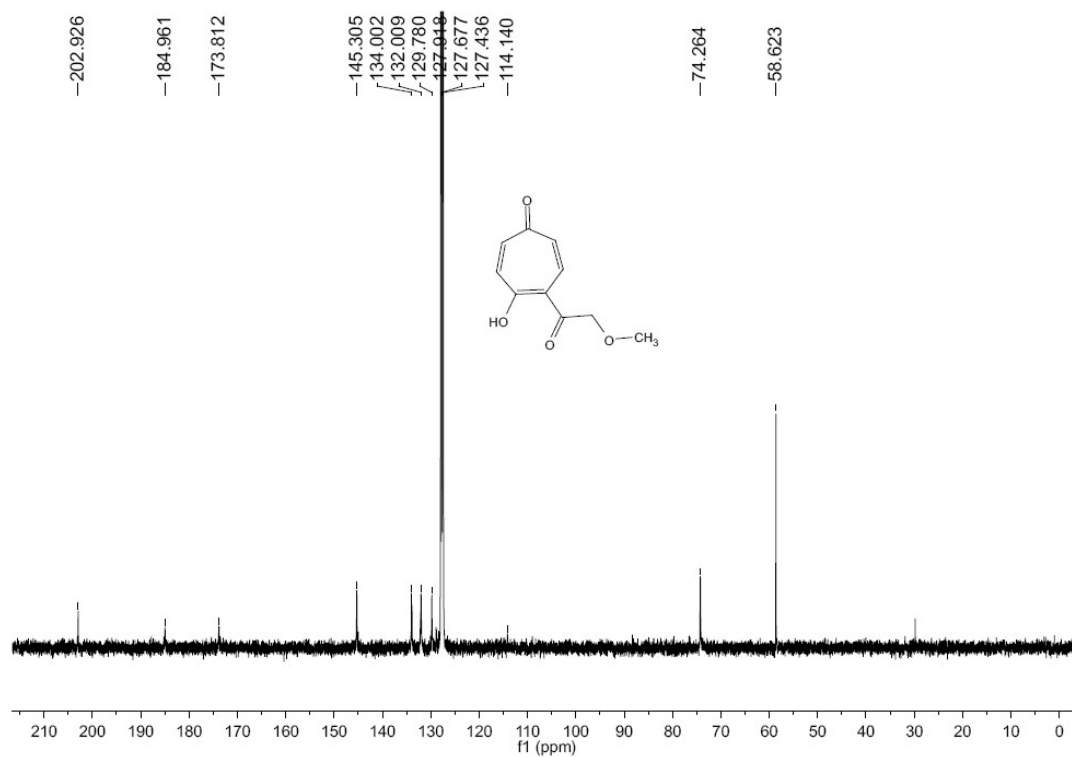

$^1\text{H}$  NMR and  $^{13}\text{C}$  NMR spectra of compound **3o**



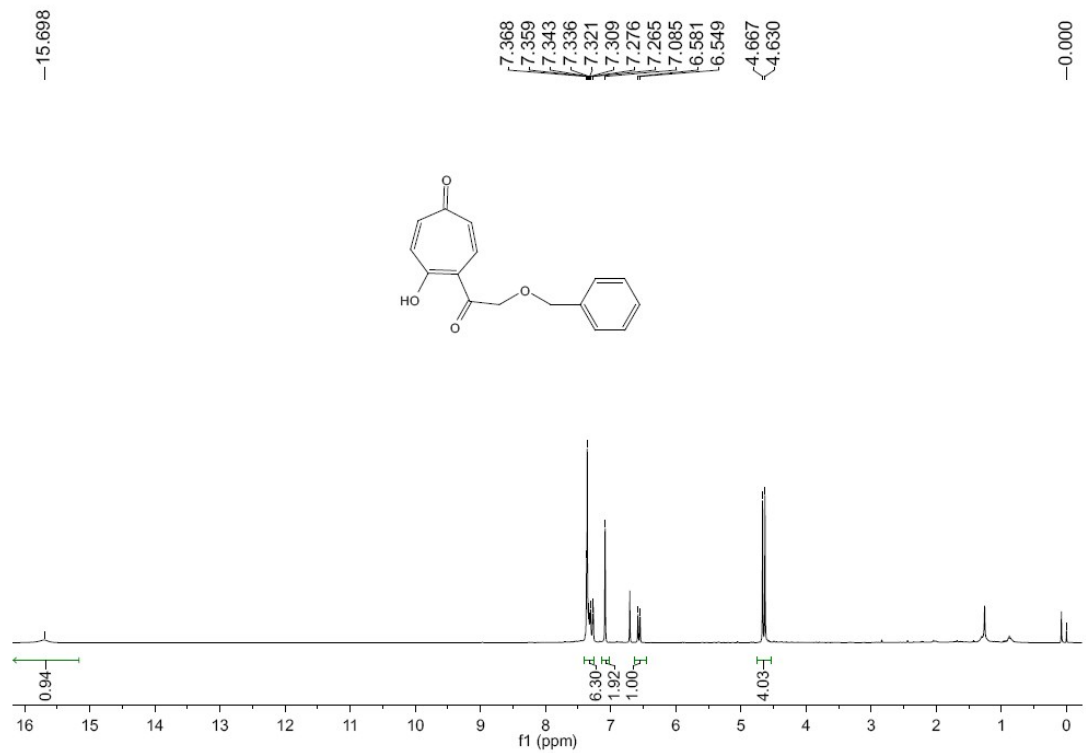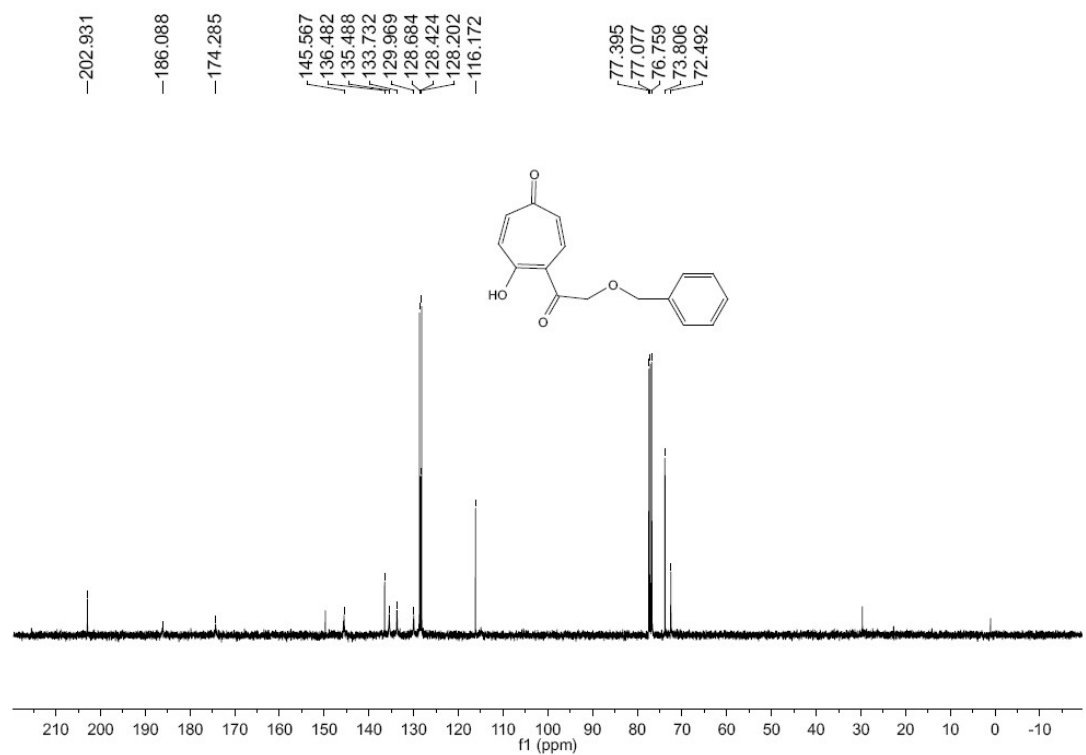

$^1\text{H}$  NMR and  $^{13}\text{C}$  NMR spectra of compound **3p**

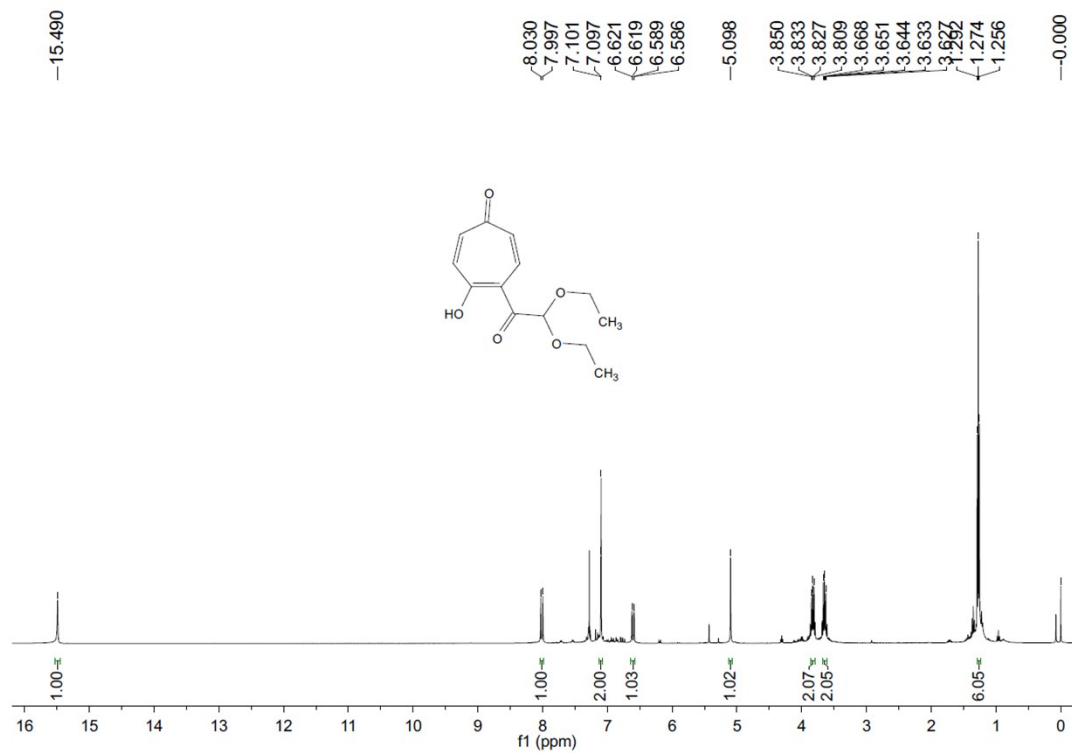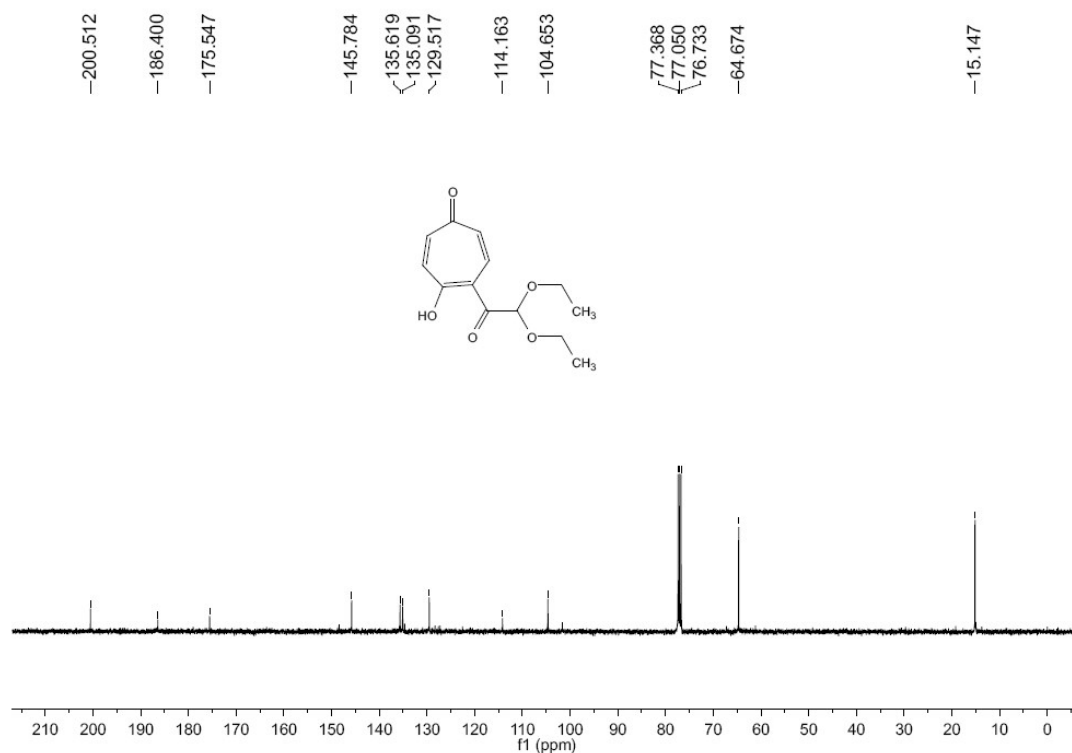

$^1\text{H}$  NMR and  $^{13}\text{C}$  NMR spectra of compound **3q**

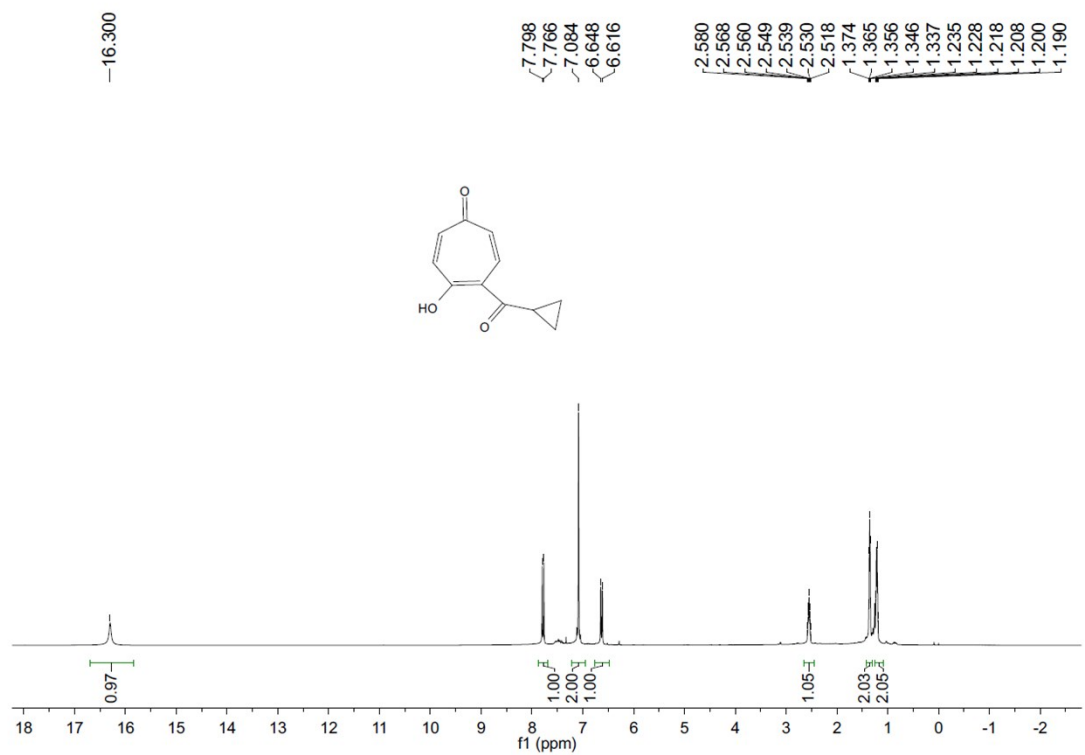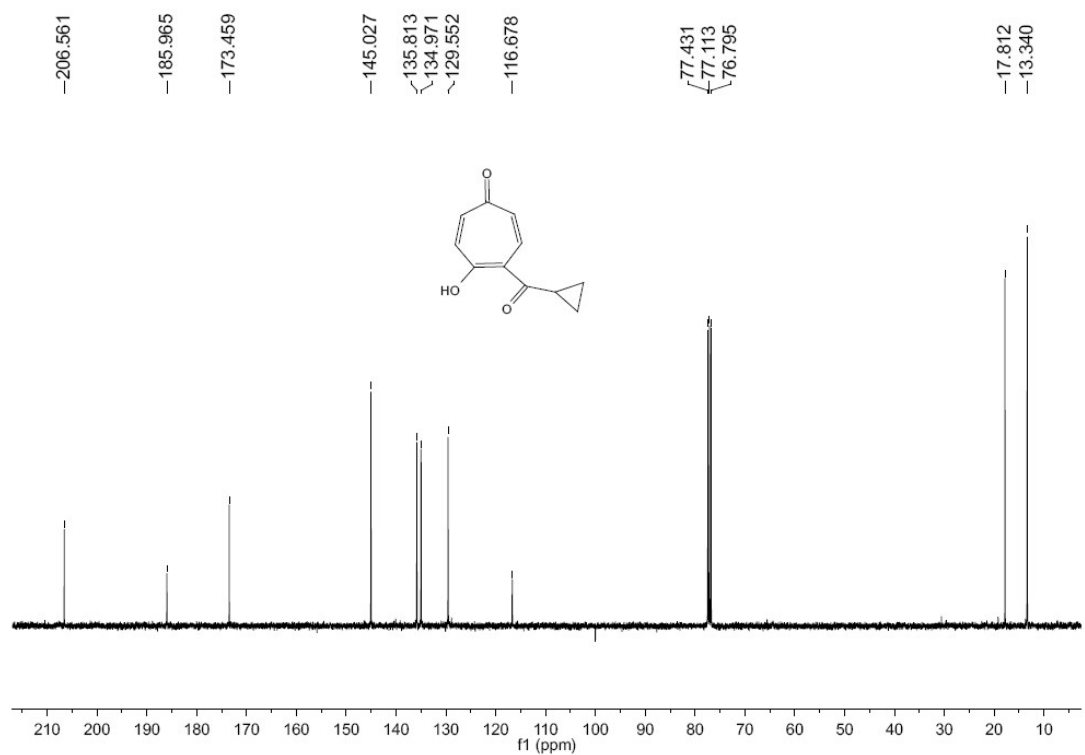

<sup>1</sup>H NMR and <sup>13</sup>C NMR spectra of compound **3r**

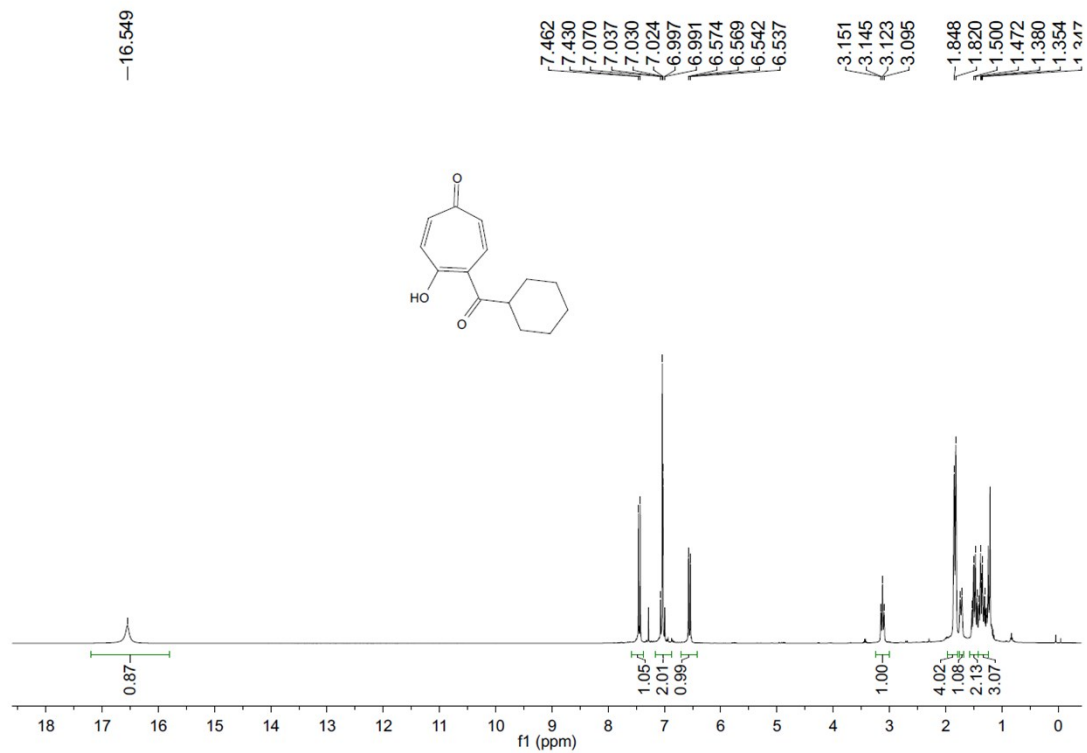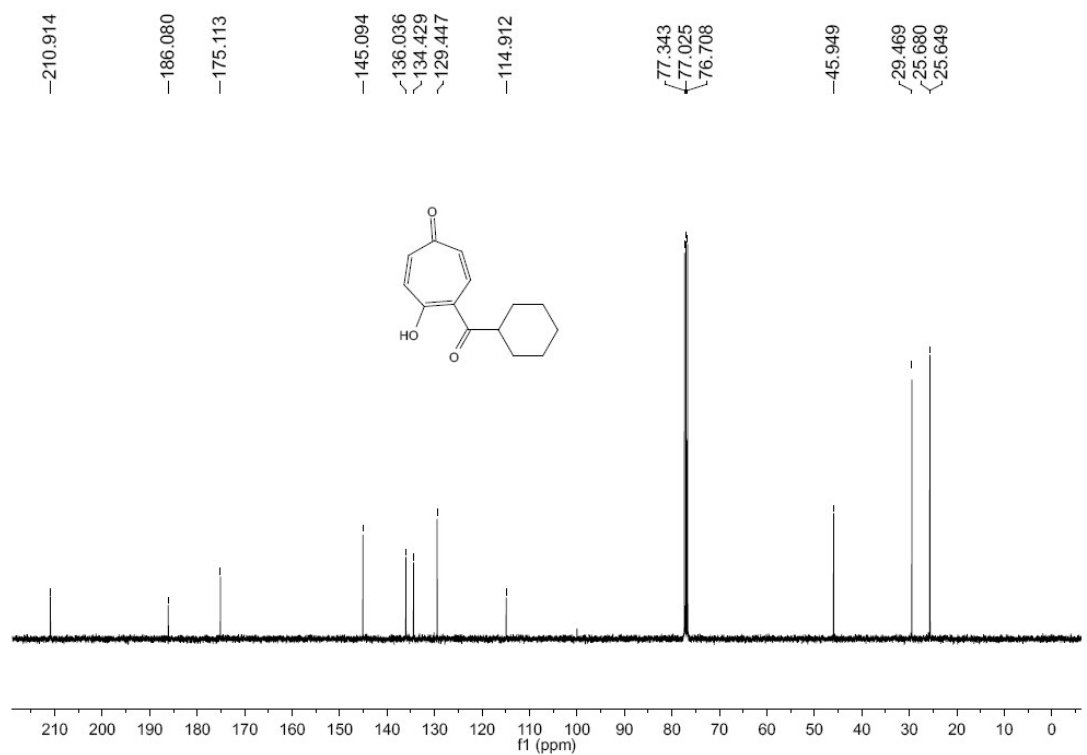

<sup>1</sup>H NMR and <sup>13</sup>C NMR spectra of compound **3s**

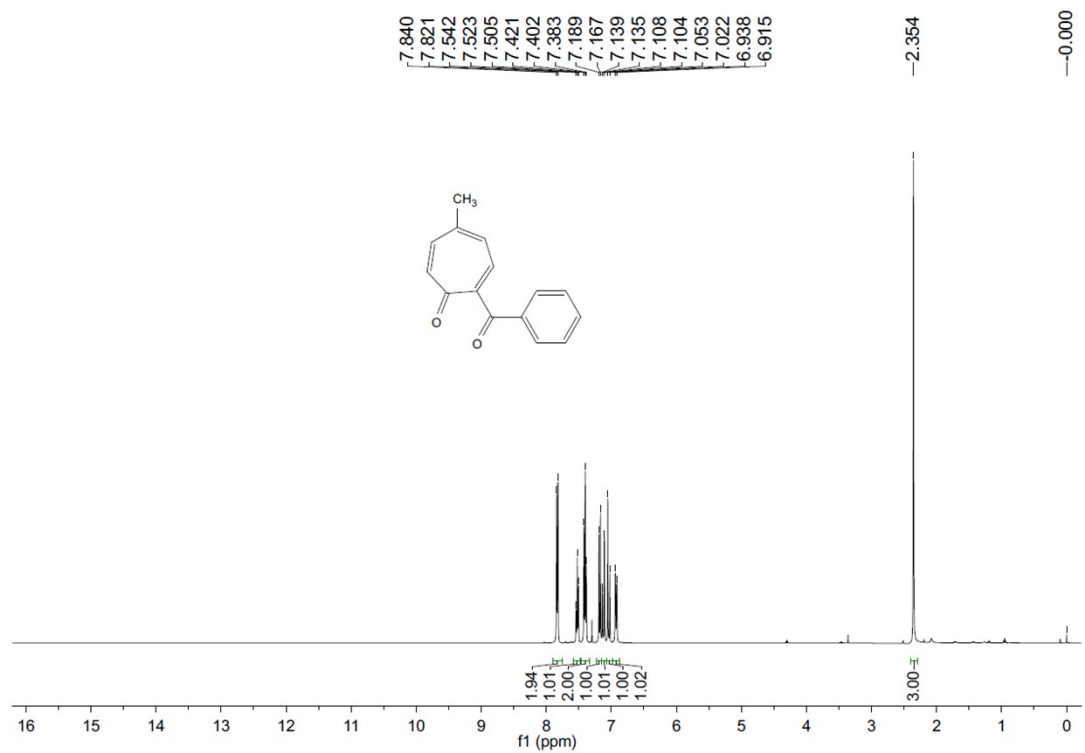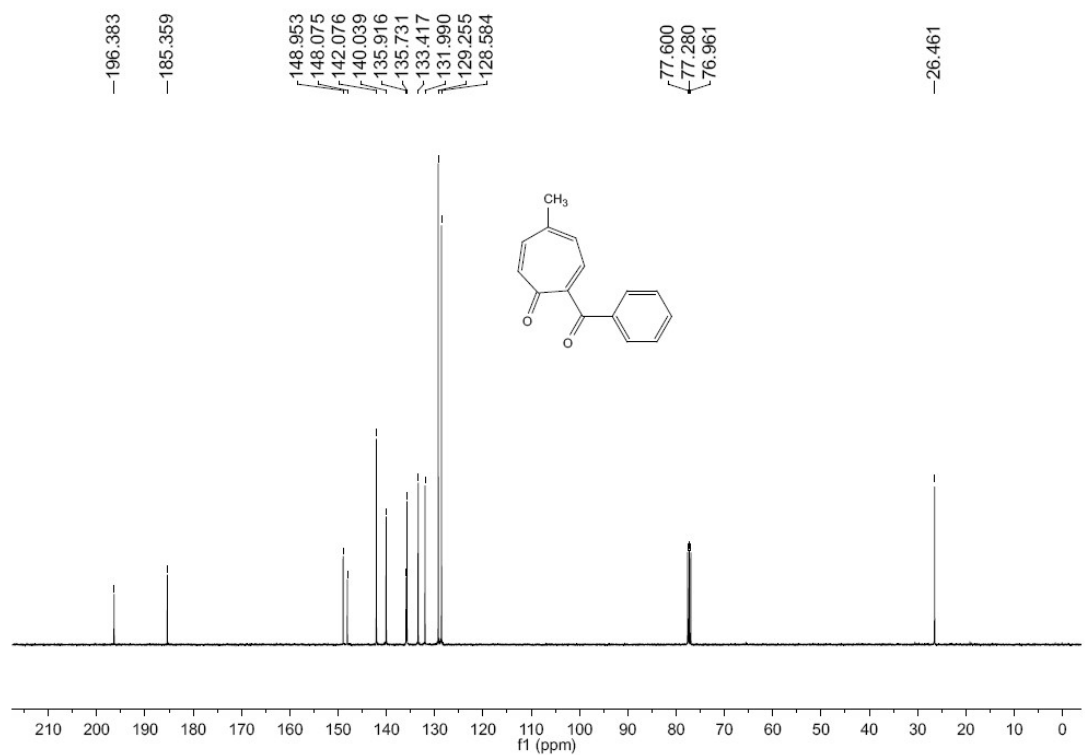

<sup>1</sup>H NMR and <sup>13</sup>C NMR spectra of compound 5a

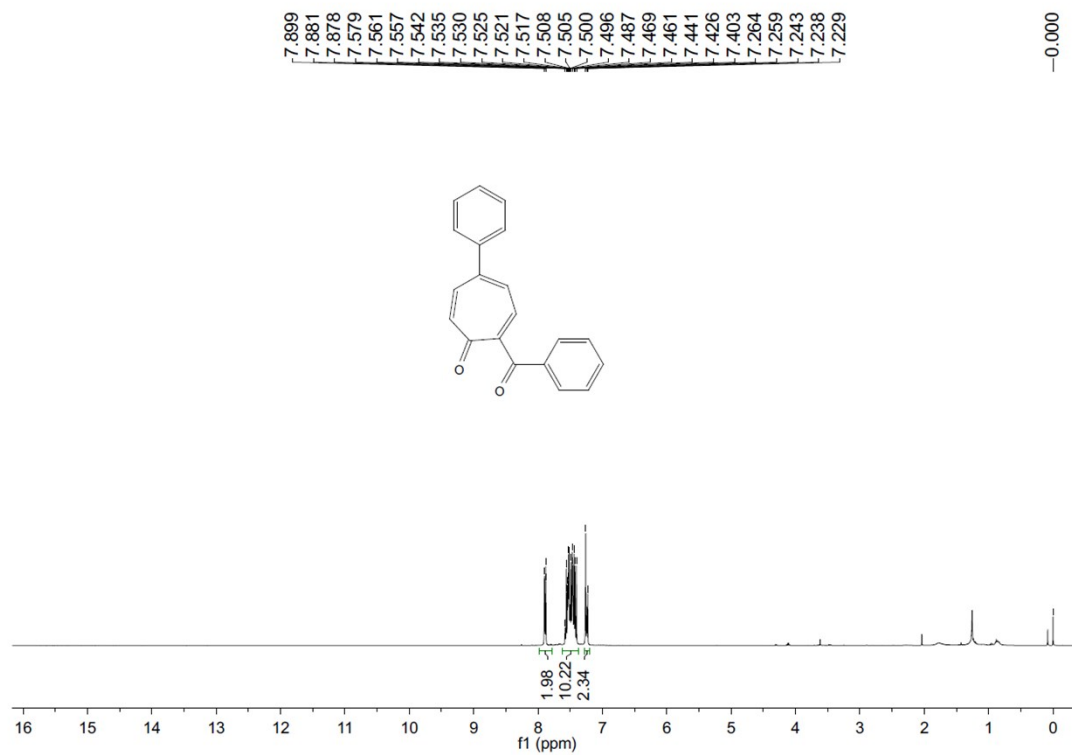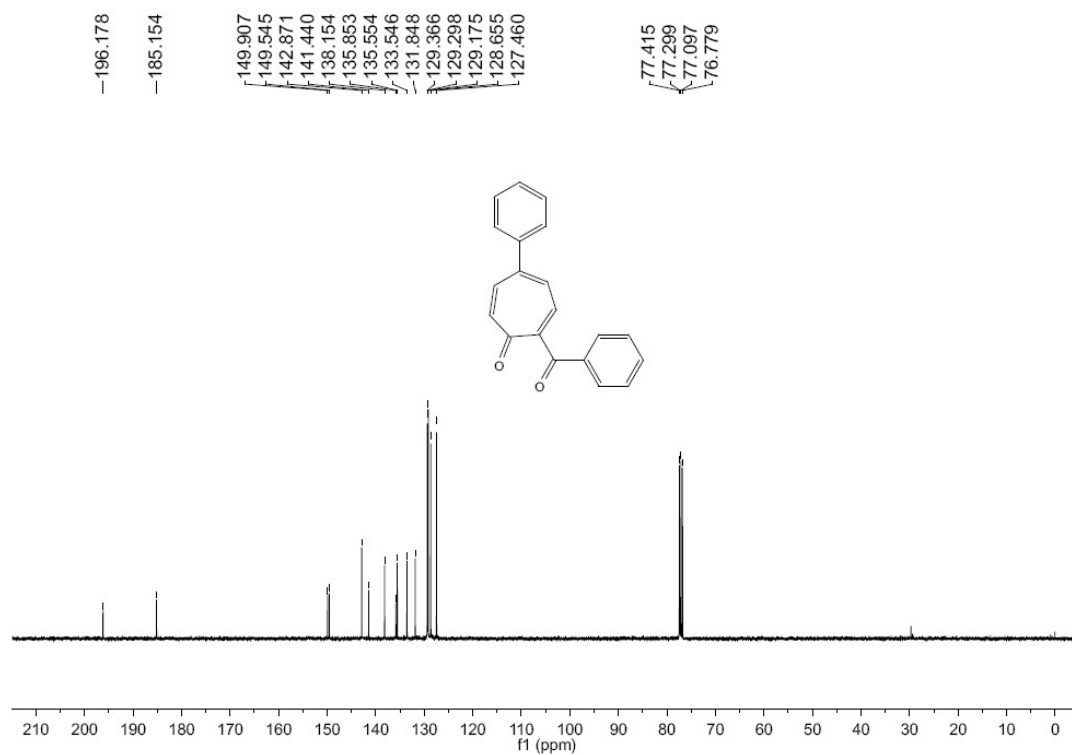

<sup>1</sup>H NMR and <sup>13</sup>C NMR spectra of compound **5b**

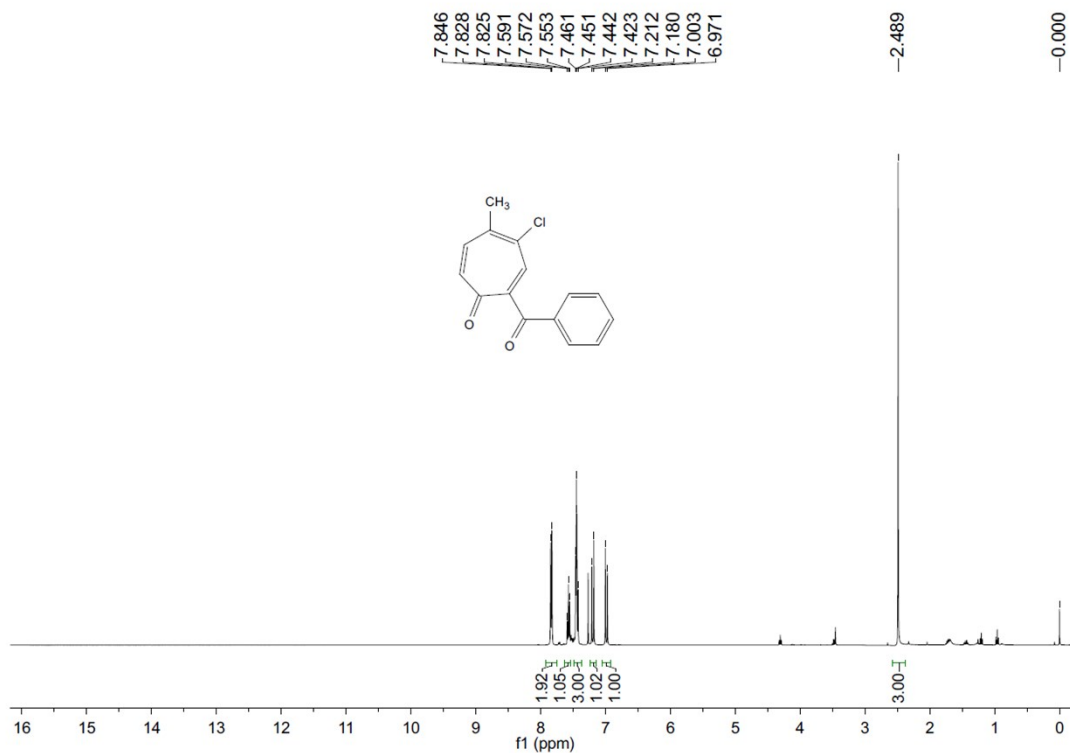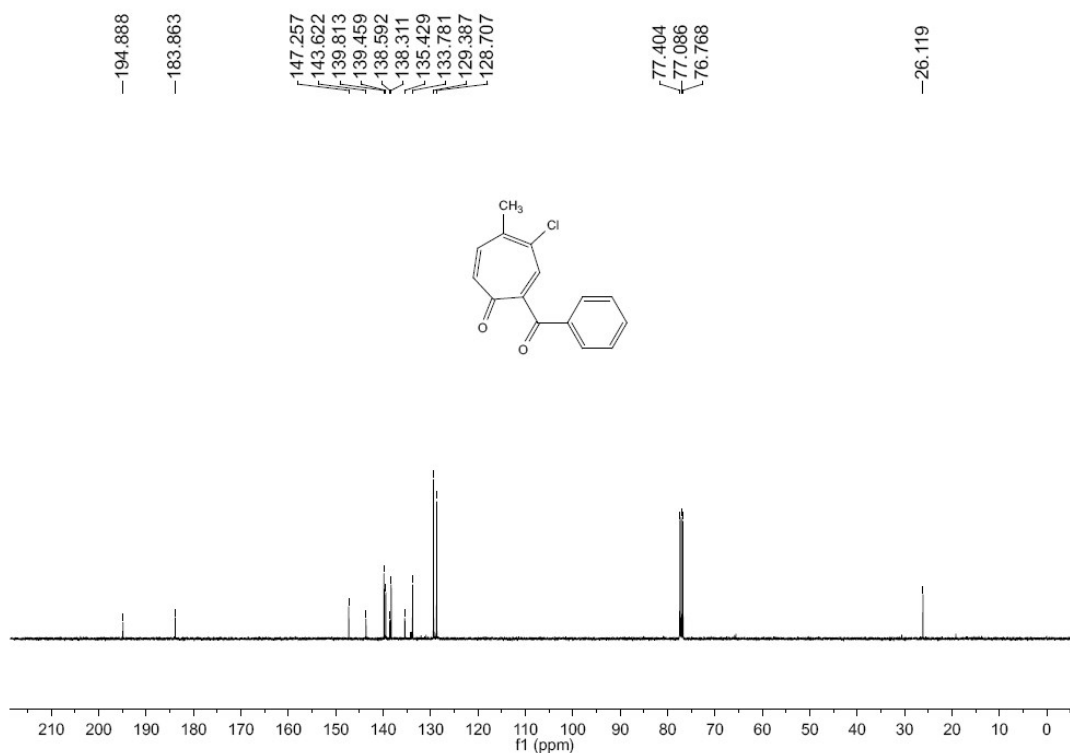

<sup>1</sup>H NMR and <sup>13</sup>C NMR spectra of compound **5c**

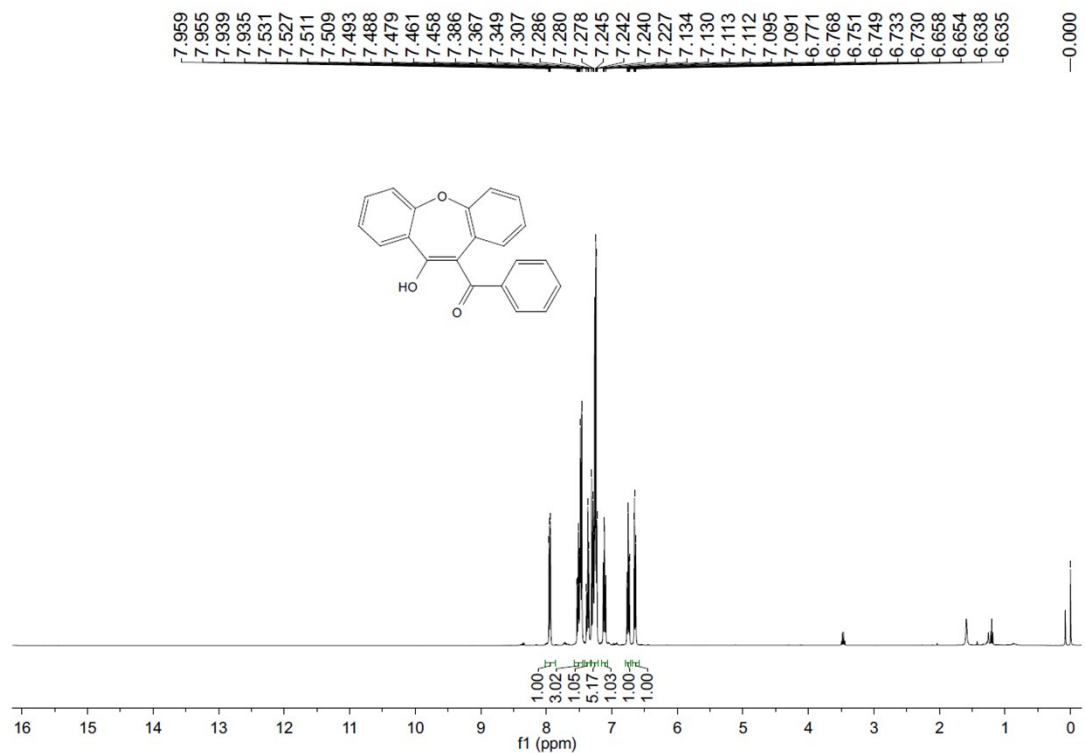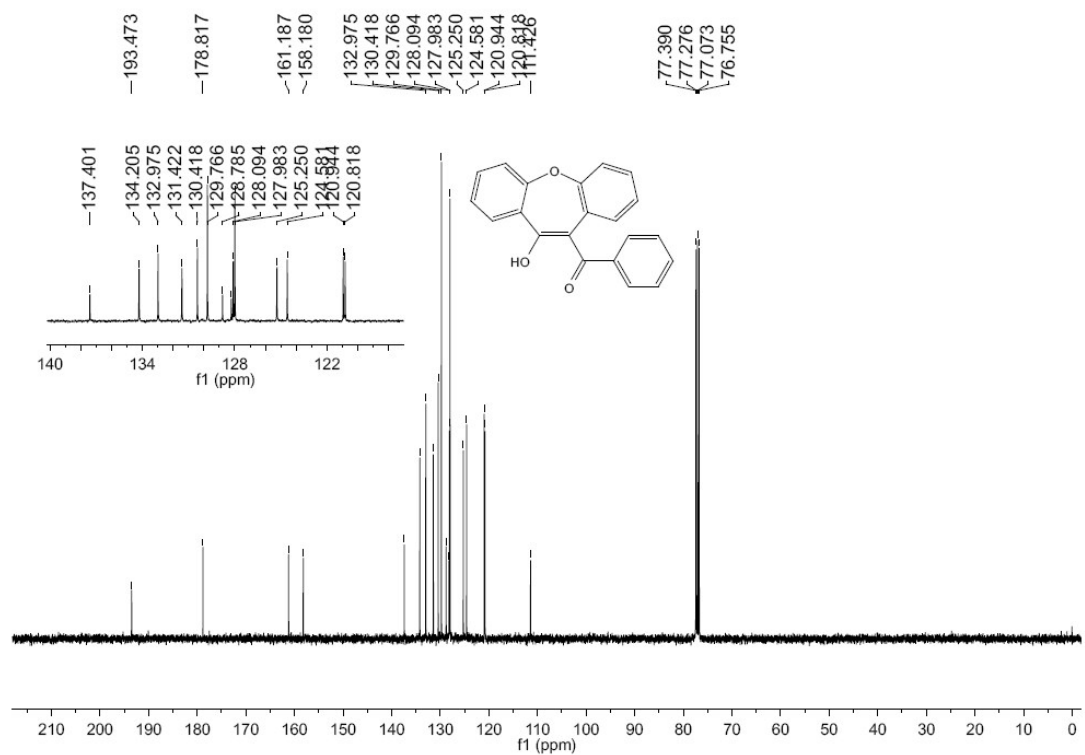

$^1\text{H}$  NMR and  $^{13}\text{C}$  NMR spectra of compound **5d**



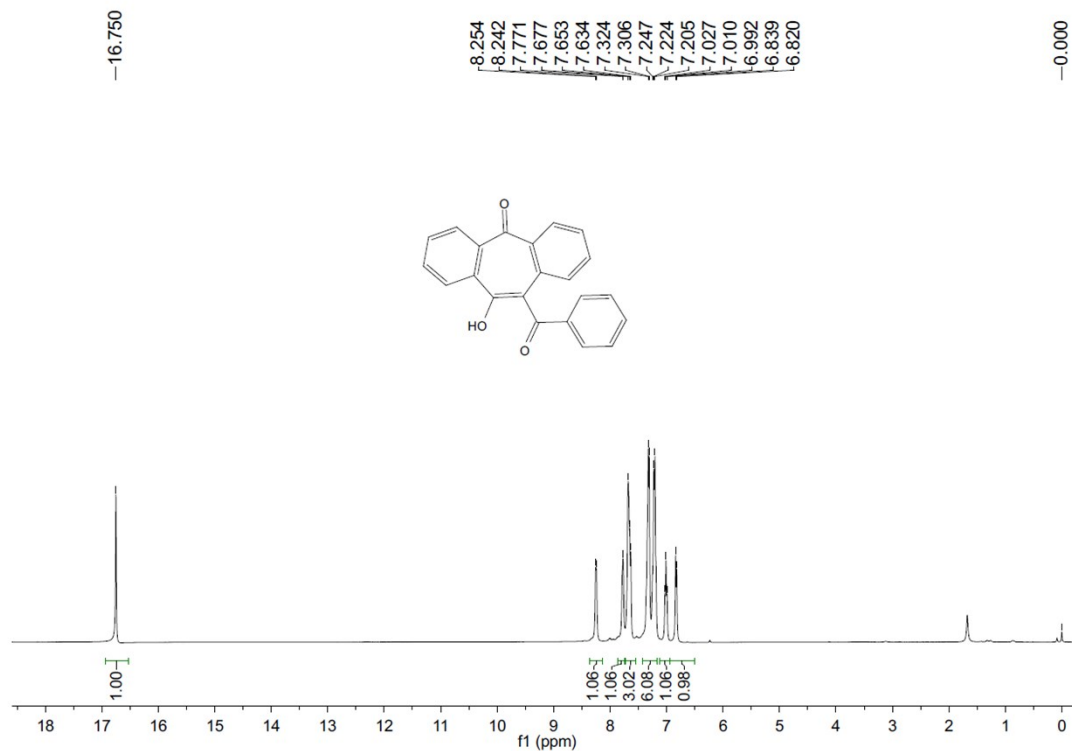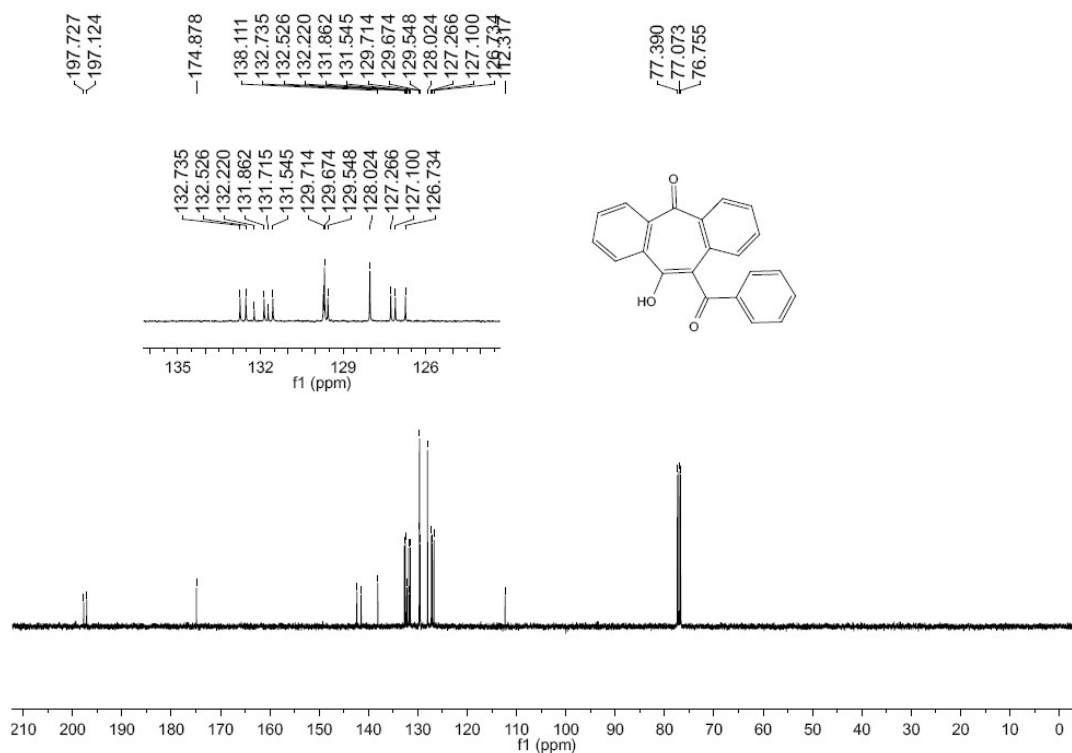

<sup>1</sup>H NMR and <sup>13</sup>C NMR spectra of compound **5e**

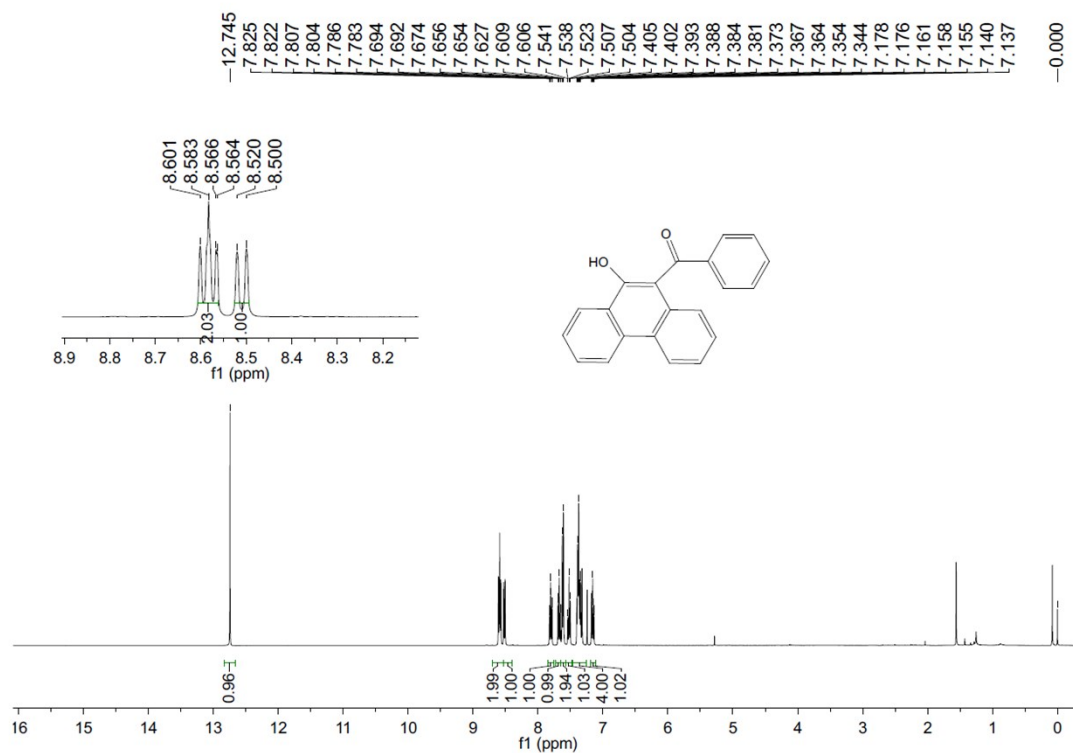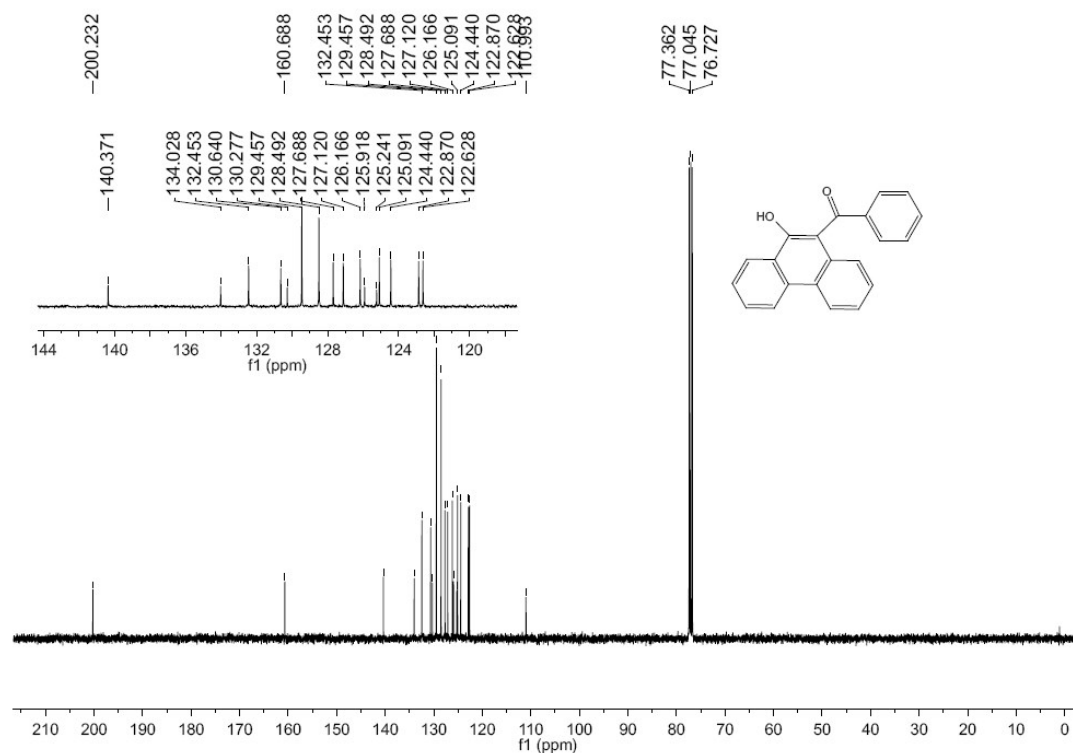

<sup>1</sup>H NMR and <sup>13</sup>C NMR spectra of compound **5f**

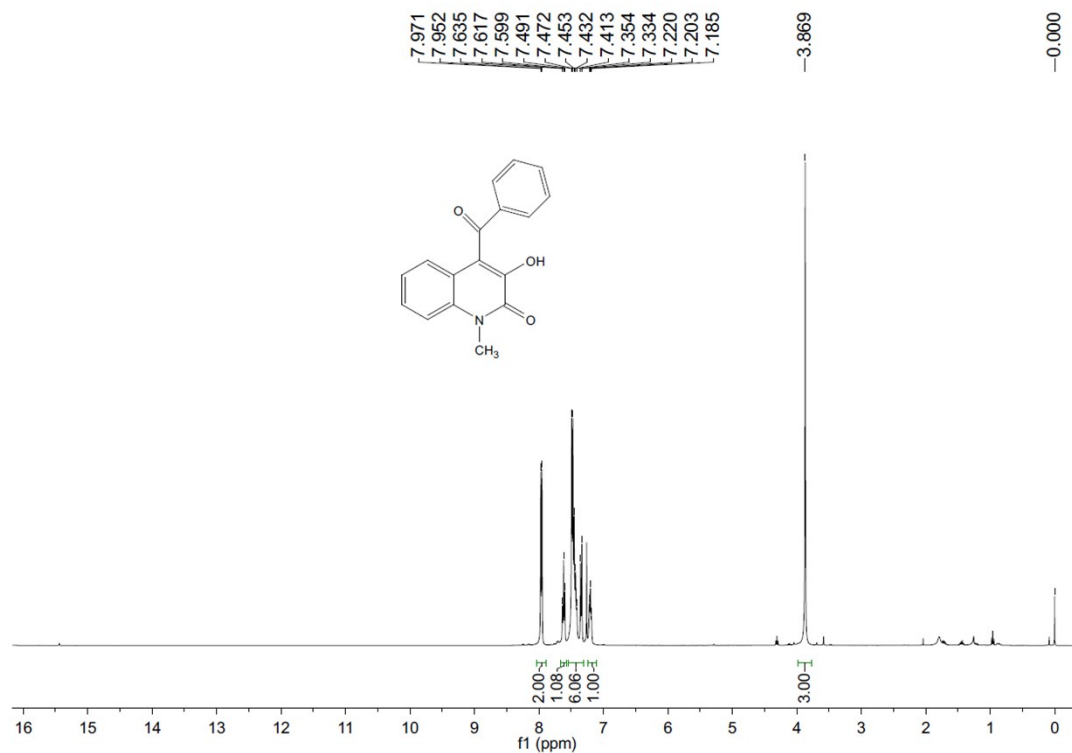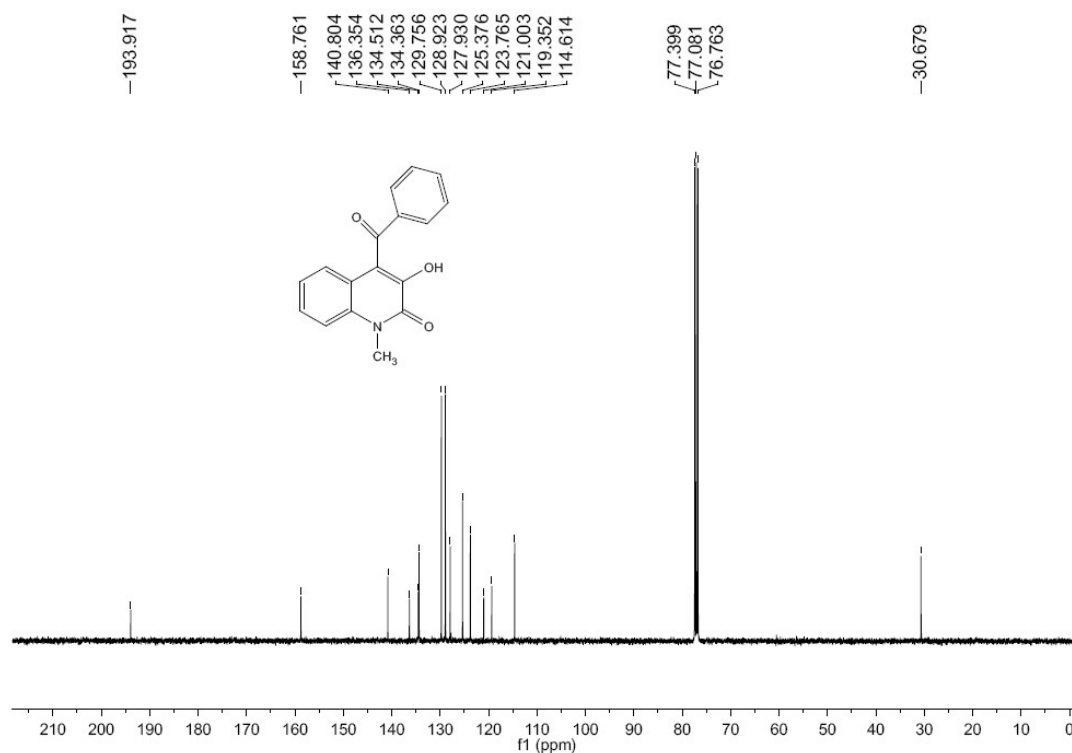

<sup>1</sup>H NMR and <sup>13</sup>C NMR spectra of compound **5g**
